# Supplementary material
Source: publisher figshare collection journal article supplement (https://tandf.figshare.com/ndownloader/files/16684772)
Supplement: Supplementary file 1 [file 16684772]

**Efficacy of emicizumab prophylaxis versus factor VIII prophylaxis for treatment of hemophilia A without inhibitors: network meta-analysis and subgroup analyses of the intra-patient comparison of the HAVEN 3 trial**

# Supplementary material

## Methods: SLR

### Supplementary Table 1. Summary protocol of the May 2018 SLR.

| **Objectives and research questions** | |
| --- | --- |
| Project objective | The overall objective of this SLR update is to provide recent information (post-December 2016) on clinical efficacy, health-related quality of life and safety from clinical trials and registries of pharmacological treatments used in mild, moderate and severe hemophilia A (with specific focus on the non-inhibitor population only). |
| **Studies to include** | |
| Study designs | Inclusion criteria   - Any interventional trial, phase 2 and beyond - All controlled and uncontrolled studies, including RCTs, single arms studies, or open-label trials - Non-interventional: registries, PMS, PASS   Exclusion criteria   - Non-interventional trials (with the exception of registries, PMS, PASS) - Observational studies - Cohort studies - Retrospective studies - Database/patient record analyses, chart reviews - Case reports, case series - Cross-sectional study - Reviews, comments, letters, editorials |
| Population | Inclusion criteria   - Patients of all ages with mild, moderate or severe hemophilia A without inhibitors   Exclusion criteria   - Acquired hemophilia - Selected sub-populations, e.g. undergoing surgery, undergoing knee replacement, hemarthroses, dental extraction, circumcision, pregnancy, etc. |
| Interventions | Inclusion criteria   - Studies assessing any pharmacological intervention (licensed and pipeline) for the treatment of hemophilia A   Exclusion criteria   - Non-pharmacological interventions - Herbal non-blood preparation - Drugs no longer on market:   - FVIII-P   - Konyne, Proplex (Prothrombincomplex concentrates)   - Tranexamic acid   - Epsilon-aminocaproic Acid   - Danazol   - Hyate:C (Porcine FVIII concentrate) |
| Comparator | - Studies comparing pharmacological interventions either to each other or to placebo or standard of care were included. - Studies assessing interventions of interest without any comparator group (single-arm studies) were also included. |
| Language | - English language only |
| **Data sources** | |
| Databases | - Medical Literature Analysis and Retrieval System Online [MEDLINE®] - Excerpta Medica DataBASE [Embase®] - Cochrane Central databases   - Cochrane Central Register of Controlled Trials (CENTRAL)   - Cochrane Database of Systematic Reviews (CDSR)   - Database of Abstracts of Reviews of Effects (DARE)   - Health technology assessment (HTA) database |
| Other sources | - Conference searching (2017-2018)   - World Federation of Haemophilia (WFH): World Congress 2016   - International Society of Thrombosis and Haemostasis (ISTH)   - International Conference on Thrombosis, Bleeding Disorders and Hemostasis (ICTBDH)   - American Society of Hematology (ASH)   - National Haemophilia Foundation (NHF): Annual Meeting   - European Haemophilia Consortium (EHC): Annual Conference   - European Association of Haemophilia and Allied Disorders (EAHAD): Annual Congress   - Haemophilia Foundation Australia: Australian and New Zealand Haemophilia Conference - Bibliography |

Embase, Excerpta Medica Database; MEDLINE, Medical Literature Analysis and Retrieval System.

FVIII, factor VIII; PASS, post-authorization safety studies; PMS, post-marketing surveillance; RCT, randomized controlled trial; SLR, systematic literature review.

### Supplementary Table 2. Final search strategy for Embase/MEDLINE (using Embase.com), for May 2018 SLR.

| No. | Query | Results |
| --- | --- | --- |
| #1 | 'hemophilia a'/exp | 20707 |
| #2 | 'hemophilia a':ab,ti OR 'haemophilia a':ab,ti OR 'hemophilia type a':ab,ti OR 'haemophilia type a':ab,ti | 12934 |
| #3 | 'classical hemophilia':ab,ti OR 'classical haemophilia':ab,ti OR 'classic hemophilia':ab,ti OR 'classic haemophilia':ab,ti | 259 |
| #4 | ('factor viii' NEAR/4 deficienc*):ab,ti | 1126 |
| #5 | ('factor 8' NEAR/4 deficienc*):ab,ti | 23 |
| #6 | hemophilia:ti OR haemophilia:ti NOT ('hemophilia b':ti OR 'haemophilia b':ti) | 16274 |
| #7 | hemophiliacs:ti OR haemophiliacs:ti OR 'hemophiliac patients':ti OR 'haemophiliac patients':ti | 1610 |
| #8 | #1 OR #2 OR #3 OR #4 OR #5 OR #6 OR #7 | 27686 |
| #9 | 'hemophilia'/exp/dm_dt | 7112 |
| #10 | 'blood clotting factor 8'/exp OR 'recombinant blood clotting factor 8'/exp | 26324 |
| #11 | 'blood clotting factor 8 concentrate'/exp | 2720 |
| #12 | immunate*:ab,ti,tn OR optivate*:ab,ti,tn OR haemoctin*:ab,ti,tn OR beriate*:ab,ti,tn OR (haemate NEXT/1 p):ab,ti,tn OR octanate*:ab,ti,tn OR wilate*:ab,ti,tn OR recombinate*:ab,ti,tn OR factane*:ab,ti,tn OR emoclot*:ab,ti,tn | 1182 |
| #13 | fanhdi*:ab,ti,tn OR wilnativ*:ab,ti,tn OR octafil*:ab,ti,tn OR amofil*:ab,ti,tn OR humaclot*:ab,ti,tn OR talate*:ab,ti,tn OR alphanate*:ab,ti,tn OR emowil*:ab,ti,tn OR klott*:ab,ti,tn OR aafact*:ab,ti,tn OR bioclate*:ab,ti,tn OR biostate*:ab,ti,tn OR wilate*:ab,ti,tn | 448 |
| #14 | helixate*:ab,ti,tn OR iblias*:ab,ti,tn OR kogenate*:ab,ti,tn OR kovaltry*:ab,ti,tn OR novoeight*:ab,ti,tn OR zonovate*:ab,ti,tn OR refacto*:ab,ti,tn OR advate*:ab,ti,tn | 1601 |
| #15 | elocta*:ab,ti,tn OR nuwiq*:ab,ti,tn OR obizur*:ab,ti,tn OR voncento*:ab,ti,tn OR adynovate*:ab,ti,tn OR factyla*:ab,ti,tn OR adynovi*:ab,ti,tn OR recombinate*:ab,ti,tn OR xyntha*:ab,ti,tn OR greengene*:ab,ti,tn | 948 |
| #16 | 'octocog alfa':ab,ti,tn OR (turoctocog NEXT/1 alfa*):ab,ti,tn OR 'moroctocog alfa':ab,ti,tn OR 'efmoroctocog alfa':ab,ti,tn OR 'simoctocog alfa':ab,ti,tn OR 'efraloctocog alfa':ab,ti,tn OR 'susoctocog alfa':ab,ti,tn | 241 |
| #17 | '139076-62-3':rn OR '1192451-26-5':rn OR '1270012-79-7':rn OR '1219013-68-9':rn OR '284036-24-4':rn OR '1456622-91-5':rn OR '1339940-90-7':rn | 1438 |
| #18 | 'pf-06741086':ab,ti,tn OR 'bay w 6240':ab,ti,tn OR nn7008:ab,ti,tn OR 'nn 7008':ab,ti,tn OR 'bay 81-8973':ab,ti,tn OR 'bay 818973':ab,ti,tn OR 'bay81-8973':ab,ti,tn OR 'pf-05208756':ab,ti,tn OR 'pf-5208756':ab,ti,tn OR '2pf-05280602':ab,ti,tn | 53 |
| #19 | 'bax 855':ab,ti,tn OR bax855:ab,ti,tn OR 'bax 802':ab,ti,tn OR bax802:ab,ti,tn OR 'bay 94-9027':ab,ti,tn OR 'bay94-9027':ab,ti,tn OR 'bay 949027':ab,ti,tn OR 'bay 14-2222':ab,ti,tn OR 'bay14-2222':ab,ti,tn OR 'bay 142222':ab,ti,tn OR 'bay79-4980':ab,ti,tn OR 'bay 79-4980':ab,ti,tn OR 'bay 794980':ab,ti,tn | 182 |
| #20 | rfviiifc:ab,ti,tn OR bddrfviii:ab,ti,tn OR sct800:ab,ti,tn OR 'sct 800':ab,ti,tn OR 'obi-1':ab,ti,tn OR 'bmn 270':ab,ti,tn OR bmn270:ab,ti,tn OR 'bax 826':ab,ti,tn OR bax826:ab,ti,tn OR 'bay79-4980':ab,ti,tn OR 'bay 79-4980':ab,ti,tn OR 'bay794980':ab,ti,tn OR biib031:ab,ti,tn OR 'biib 031':ab,ti,tn | 316 |
| #21 | 'factor viii':ab,ti OR fviii:ab,ti OR 'factor 8':ab,ti AND (treatment:ab,ti OR therapy:ab,ti OR treated:ab,ti OR regimen*:ab,ti OR concentrate*:ab,ti OR recombinant:ab,ti OR dose*:ab,ti OR dosing:ab,ti OR prophylaxis:ab,ti OR prophylactic:ab,ti OR agent*:ab,ti OR medication*:ab,ti OR infusion*:ab,ti OR (adverse NEXT/2 effect*):ab,ti OR complication*:ab,ti OR 'plasma-derived':ab,ti) | 15908 |
| #22 | 'factor viii product':ab,ti OR 'fviii product':ab,ti OR 'factor 8 product' | 322 |
| #23 | 'recombinant factor viii':ab,ti OR 'recombinant fviii':ab,ti OR 'recombinant factor 8' | 1906 |
| #24 | rfviii:ab,ti OR 'r-fviii':ab,ti OR rhfviii:ab,ti | 1217 |
| #25 | (antihemophilic NEXT/1 factor*):ab,ti OR (antihaemophilic NEXT/1 factor*):ab,ti OR (anti NEXT/1 hemophilic NEXT/1 factor*):ab,ti OR (anti NEXT/1 haemophilic NEXT/1 factor*):ab,ti | 686 |
| #26 | 'desmopressin'/exp | 11126 |
| #27 | desmopressin:ab,ti,tn OR ddavp:ab,ti,tn OR minirin*:ab,ti,tn | 6583 |
| #28 | 'tranexamic acid'/exp OR 'tranexamic acid':ab,ti,tn | 10907 |
| #29 | 'aminocaproic acid'/exp OR 'aminocaproid acid':ab,ti,tn | 6039 |
| #30 | 'emicizumab'/exp | 104 |
| #31 | emicizumab*:ab,ti,tn | 60 |
| #32 | ace910:ab,ti,tn OR 'ace 910':ab,ti,tn OR rg6013:ab,ti,tn OR 'rg 6013':ab,ti,tn OR 'ro 5534262':ab,ti,tn OR ro5534262:ab,ti,tn OR 'ro 553-4262':ab,ti,tn | 78 |
| #33 | '1610943-06-0':rn | 89 |
| #34 | 'hemostatic agent'/de | 9132 |
| #35 | 'factor replacement':ab,ti | 1018 |
| #36 | 'eptacog alfa':ab,ti,tn OR 'nn-007':ab,ti,tn OR nn007:ab,ti,tn OR 'nn 1731':ab,ti,tn OR nn1731:ab,ti,tn OR 'bay86-6150':ab,ti,tn OR 'bay 86-6150':ab,ti,tn OR 'bay 866150':ab,ti,tn OR 'vatreptacog alfa':ab,ti,tn OR novoseven*:ab,ti,tn OR niastase*:ab,ti,tn | 2288 |
| #37 | 'blood clotting factor 7a inhibitor'/exp OR 'recombinant blood clotting factor 8'/exp | 3863 |
| #38 | 'factor 7a':ab,ti OR 'factor viia':ab,ti OR fviia:ab,ti OR rfviia:ab,ti | 6711 |
| #39 | 'bax 817':ab,ti,tn OR bax817:ab,ti,tn | 5 |
| #40 | 'activated prothrombin complex'/exp | 2000 |
| #41 | feiba:ab,ti,tn | 1162 |
| #42 | 'anti-inhibitor coagulant complex':ab,ti OR 'aicc complex':ab,ti | 48 |
| #43 | (activated NEXT/1 prothrombin NEXT/1 complex NEXT/1 concentrate*):ab,ti | 655 |
| #44 | 'csl 689':ab,ti,tn OR csl689:ab,ti,tn | 3 |
| #45 | iti:ab,ti | 2035 |
| #46 | 'immune tolerance induction':ab,ti | 888 |
| #47 | 'n8-gp':ab,ti,tn OR 'nn 7088':ab,ti,tn OR nn7088;ab,ti,tn | 52 |
| #48 | afstyla*:ab,ti,tn | 20 |
| #49 | 'lonoctocog alfa':ab,ti,tn | 4 |
| #50 | '1388129-63-2':rn | 820 |
| #51 | 'csl 627':ab,ti,tn OR cls627:ab,ti,tn | 8 |
| #52 | 'aln-at3':ab,ti,tn OR 'aln-at3sc':ab,ti,tn OR fitusiran:ab,ti,tn OR alnylam*:ab,ti,tn | 77 |
| #53 | #9 OR #10 OR #11 OR #12 OR #13 OR #14 OR #15 OR #16 OR #17 OR #18 OR #19 OR #20 OR #21 OR #22 OR #23 OR #24 OR #25 OR #26 OR #27 OR #28 OR #29 OR #30 OR #31 OR #32 OR #33 OR #34 OR #35 OR #36 OR #37 OR #38 OR #39 OR #40 OR #41 OR #42 OR #43 OR #44 OR #45 OR #46 OR #47 OR #48 OR #49 OR #50 OR #51 OR #52 | 74389 |
| #54 | 'clinical trial'/de | 961647 |
| #55 | 'randomized controlled trial'/de | 492444 |
| #56 | 'placebo'/de | 321569 |
| #57 | rct:ab,ti OR random*:ab,ti | 1282122 |
| #58 | ((single OR double) NEXT/1 (blind* OR mask*)):ab,ti AND (trial*:ab,ti OR study:ab,ti OR rct:ab,ti OR cct:ab,ti) | 193864 |
| #59 | ((treble OR triple) NEXT/1 (blind* OR mask*)):ab,ti AND (trial*:ab,ti OR study:ab,ti OR rct:ab,ti OR cct:ab,ti) | 820 |
| #60 | placebo*:ab,ti | 269053 |
| #61 | (single NEXT/2 arm*):de,ab,ti AND (trial*:ab,ti OR study:ab,ti OR rct:ab,ti OR cct:ab,ti) | 10828 |
| #62 | ('non-randomized' NEAR/3 (trial* OR study OR design)):ab,ti OR ('non-randomised' NEAR/3 (trial* OR study OR design)):ab,ti | 9600 |
| #63 | 'non-rct':ab,ti OR nrct:ab,ti | 336 |
| #64 | (uncontrolled NEAR/3 (trial* OR study OR design)):ab,ti OR ('non-controlled' NEAR/3 (trial* OR study OR design)):ab,ti | 5192 |
| #65 | 'controlled clinical trial':de | 433742 |
| #66 | (controlled NEAR/3 (trial* OR study)):ab,ti | 363315 |
| #67 | (parallel NEXT/1 group*):ab,ti | 21248 |
| #68 | 'clinical trial'/de | 961647 |
| #69 | 'phase 2 clinical trial'/exp OR 'phase 3 clinical trial'/exp OR 'phase 4 clinical trial'/exp | 95370 |
| #70 | ('phase 2' NEAR/3 (trial* OR study OR design)):ab,ti | 12453 |
| #71 | ('phase ii' NEAR/3 (trial* OR study OR design)):ab,ti | 51902 |
| #72 | ('phase 3' NEAR/3 (trial* OR study OR design)):ab,ti | 15528 |
| #73 | ('phase iii' NEAR/3 (trial* OR study OR design)):ab,ti | 36790 |
| #74 | ('phase 4' NEAR/3 (trial* OR study OR design)):ab,ti | 521 |
| #75 | ('phase iv' NEAR/3 (trial* OR study OR design)):ab,ti | 1446 |
| #76 | 'open label':de,ab,ti | 62734 |
| #77 | (open NEXT/3 (trial* OR study OR design)):ab,ti | 45783 |
| #78 | crossover:de,ab,ti OR 'cross-over':de,ab,ti | 101142 |
| #79 | 'postmarketing surveillance'/exp OR 'post-marketing':ab,ti OR postmarketing:ab,ti | 36469 |
| #80 | #54 OR #55 OR #56 OR #57 OR #58 OR #59 OR #60 OR #61 OR #62 OR #63 OR #64 OR #65 OR #66 OR #67 OR #68 OR #69 OR #70 OR #71 OR #72 OR #73 OR #74 OR #75 OR #76 OR #77 OR #78 OR #79 | 2329973 |
| #81 | #80 NOT ('animal'/de NOT 'human'/exp) | 2283368 |
| #82 | 'disease registry'/exp | 11070 |
| #83 | 'register'/exp | 107868 |
| #84 | registry:ab,ti OR registries:ab,ti OR register*:ab,ti | 359224 |
| #85 | (hemophilia NEXT/2 database):ab,ti OR (haemophilia NEXT/2 database):ab,ti | 79 |
| #86 | #82 OR #83 OR #84 OR #85 | 374222 |
| #87 | #80 OR #86 | 2616766 |
| #88 | #8 AND #53 | 16236 |
| #89 | #87 AND #88 | 2601 |
| #90 | #87 AND #88 AND [14-12-2016]/sd NOT [9-5-2018]/sd | **439** |

Searches were run from 13th Dec 2016 to 14th May 2018.

### Supplementary Table 3. Final search strategy for Cochrane (using Cochrane interface) for May 2018 systematic literature review.

| No. | Query | Results |
| --- | --- | --- |
| #1 | [mh "hemophilia a"] | 227 |
| #2 | "hemophilia a":ab,ti or "haemophilia a":ab,ti,kw or "hemophilia type a":ab,ti or "haemophilia type a":ab,ti,kw | 509 |
| #3 | "classical hemophilia":ab,ti,kw or "classical haemophilia":ab,ti,kw or "classic hemophilia":ab,ti,kw or "classic haemophilia":ab,ti,kw | 0 |
| #4 | ("factor viii" near/4 deficienc*):ab,ti,kw | 17 |
| #5 | ("factor 8" near/4 deficienc*):ab,ti,kw | 0 |
| #6 | (hemophilia:ti or haemophilia:ti) not ("hemophilia b":ti or "haemophilia b":ti) | 563 |
| #7 | "hemophiliacs":ti,kw or "haemophiliacs":ti,kw or "hemophiliac patients":ti,kw or " haemophiliac patients":ti,kw | 70 |
| #8 | [1-#7] | 793 |
| #9 | [mh "hemophilia a"/DT] or [mh "hemophilia a"/PC] or [mh "hemophilia a"/TH] | 209 |
| #10 | [mh "factor viii"] | 317 |
| #11 | immunate*:ab,ti,kw or optivate*:ab,ti,kw or haemoctin*:ab,ti,kw or beriate*:ab,ti,kw or (haemate next/1 p):ab,ti,kw or octanate*:ab,ti,kw or wilate*:ab,ti,kw or recombinate*:ab,ti,kw or factane*:ab,ti,kw or emoclot*:ab,ti,kw | 31 |
| #12 | fanhdi*:ab,ti,kw or wilnativ*:ab,ti,kw or octafil*:ab,ti,kw or amofil*:ab,ti,kw or humaclot*:ab,ti,kw or talate*:ab,ti,kw or alphanate*:ab,ti,kw or emowil*:ab,ti,kw or klott*:ab,ti,kw or aafact*:ab,ti,kw or bioclate*:ab,ti,kw or biostate*:ab,ti,kw or wilate*:ab,ti,kw | 12 |
| #13 | helixate*:ab,ti,kw or iblias*:ab,ti,kw or kogenate*:ab,ti,kw or kovaltry*:ab,ti,kw or novoeight*:ab,ti,kw or zonovate*:ab,ti,kw or refacto*:ab,ti,kw or advate*:ab,ti,kw or elocta*:ab,ti,kw or nuwiq*:ab,ti,kw | 60 |
| #14 | obizur*:ab,ti,kw or voncento*:ab,ti,kw or adynovate*:ab,ti,kw or factyla*:ab,ti,kw or adynovi*:ab,ti,kw or xyntha*:ab,ti,kw or greengene*:ab,ti,kw | 19 |
| #15 | "octocog alfa":ab,ti,kw or (turoctocog next/1 alfa*):ab,ti,kw or "moroctocog alfa":ab,ti,kw or "efmoroctocog alfa":ab,ti,kw or "simoctocog alfa":ab,ti,kw or "efraloctocog alfa":ab,ti,kw | 20 |
| #16 | "pf-06741086":ab,ti,kw or "bay w 6240":ab,ti,kw or "nn 7008":ab,ti,kw or nn7008:ab,ti,kw or "bay 81-8973":ab,ti,kw or "pf-05208756":ab,ti,kw or "pf-5208756":ab,ti,kw or "2pf-05280602":ab,ti,kw | 30 |
| #17 | "bax 855":ab,ti,kw or bax855:ab,ti,kw or bax802:ab,ti,kw or "bax 802":ab,ti,kw or "bay94-9027":ab,ti,kw or "bay 94-9027":ab,ti,kw or "bay 949027":ab,ti,kw or "bay 14-2222":ab,ti,kw or "bay14-2222":ab,ti,kw or "bay 142222":ab,ti,kw or "bay79-4980":ab,ti,kw or "bay 79-4980":ab,ti,kw or "bay 794980":ab,ti,kw | 34 |
| #18 | rfviiifc:ab,ti,kw or bddrfviii:ab,ti,kw or sct800:ab,ti,kw "sct 800":ab,ti,kw or "obi-1":ab,ti,kw or "bmn 270":ab,ti,kw or bmn270:ab,ti,kw or "bax 826":ab,ti,kw or bax826:ab,ti,kw or "bay79-4980":ab,ti,kw or "bay 79-4980":ab,ti,kw or "bay 794980":ab,ti,kw or biib031:ab,ti,kw or "biib 031":ab,ti,kw | 32 |
| #19 | "factor viii":ab,ti,kw or "fviii":ab,ti,kw or "factor 8":ab,ti,kw | 938 |
| #20 | rfviii:ab,ti,kw or "r-fviii":ab,ti,kw or rhfviii:ab,ti,kw | 94 |
| #21 | "blood clotting factor 8":ab,ti,kw or "recombinant blood clotting factor 8":ab,ti,kw | 335 |
| #22 | (antihemophilic next/1 factor*):ab,ti or (antihaemophilic next/1 factor*):ab,ti or (anti next/1 hemophilic next/1 factor*):ab,ti or (anti next/1 haemophilic next/1 factor*):ab,ti | 21 |
| #23 | [mh "deamino arginine vasopressin"] | 345 |
| #24 | desmopressin:ab,ti,kw or ddavp:ab,ti,kw | 655 |
| #25 | [mh "tranexamic acid"] or "tranexamic acid":ab,ti,kw | 1542 |
| #26 | [mh "aminocaproic acid"] or "aminocaproic acid":ab,ti,kw | 238 |
| #27 | [mh "antifibrinolytic agents"] | 647 |
| #28 | "emicizumab":ab,ti,kw | 14 |
| #29 | ace910:ab,ti,kw or "ace 910":ab,ti,kw or rg6013:ab,ti,kw or "rg 6013":ab,ti,kw or "ro 5534262":ab,ti,kw or ro5534262:ab,ti,kw or "ro 553-4262":ab,ti,kw | 9 |
| #30 | [mh "blood coagulation factors"/TU] | 2344 |
| #31 | [mh ^coagulants] | 72 |
| #32 | "factor replacement":ab,ti | 26 |
| #33 | "eptacog alfa":ab,ti,kw or "nn-007":ab,ti,kw or nn007:ab,ti,kw or "nn 1731":ab,ti,kw or nn1731:ab,ti,kw or "bay86-6150":ab,ti,kw or "bay 86-6150":ab,ti,kw or "bay 866150":ab,ti,kw or "vatreptacog alfa":ab,ti,kw or novoseven*:ab,ti,kw or niastase*:ab,ti,kw | 90 |
| #34 | [mh "factor VIIa"] | 210 |
| #35 | "factor 7a":ab,ti or "factor viia":ab,ti or fviia:ab,ti or rfviia:ab,ti | 333 |
| #36 | "bax 817":ab,ti,kw or bax817:ab,ti,kw | 0 |
| #37 | Feiba:ab,ti,kw | 44 |
| #38 | "anti-inhibitor coagulant complex":ab,ti,kw or "anti-inhibitor coagulant complex":ab,ti,kw or "aicc complex":ab,ti,kw | 13 |
| #39 | (activated next/1 prothrombin next/1 complex next/1 concentrate*):ab,ti,kw | 26 |
| #40 | "csl 689":ab,ti,kw or csl689:ab,ti,kw | 0 |
| #41 | iti:ab,ti | 113 |
| #42 | "immune tolerance induction":ab,ti | 25 |
| #43 | "n8-gp":ab,ti,kw or nn7088:ab,ti,kw or "nn 7088":ab,ti,kw | 4 |
| #44 | afstyla*:ab,ti,kw | 1 |
| #45 | "lonoctocog alfa":ab,ti,kw | 0 |
| #46 | "csl 627":ab,ti,kw or cls627:ab,ti,kw | 0 |
| #47 | "aln-at3":ab,ti,kw or "aln-at3sc":ab,ti,kw or fitusiran:ab,ti,kw or alnylam*:ab,ti,kw | 11 |
| #48 | [2-#47] | 6015 |
| #49 | #8 and #48 | 578 |
| #50 | #49 in Cochrane Reviews (Reviews and Protocols), Other Reviews, Trials and Technology Assessments | 543 |
| #51 | #50 Publication Year from 2017 to 2018, in Cochrane Reviews (Reviews and Protocols), Other Reviews, Trials and Technology Assessments | **68** |

Searches were run from 13th Dec 2016 to 14th May 2018.

### Supplementary Text 1. Assessment of risk of bias of included trials.

Four studies included in the network meta-analysis (NMA) were RCTs and were assessed according to the National Institute for Health and Care Excellence (NICE) Critical Appraisal Checklist for RCTs. These four studies were LEOPOLD 2, A-LONG, SPINART, and HAVEN 3 (Supplementary Table 4).

One of the studies included in a sensitivity analysis of this NMA (Valentino 2012) was a single arm study with within-trial comparison and was therefore assessed according to the National Institutes of Health (NIH) Quality Assessment Tool for Case Series Studies (Supplementary Table 5).

Overall these assessments found that all RCTs carried at least some risk of bias according to NICE criteria, most notably the risk introduced by lack of blinding. HAVEN 3 in particular, but also LEOPOLD 2 and SPINART stood out for showing low risk of bias for most of the categories assessed. The NIH Quality Assessment Tool showed an overall fair to good quality rating on the single arm study—though this remains a single arm study.

### Supplementary Table 4. NICE critical appraisal of studies included in NMA.

| **Author and year** | **Study acronym or NCT number** | **Was randomization carried out appropriately?** | **Was the concealment of treatment allocation adequate?** | **Were the groups similar at the outset of the study in terms of prognostic factors?** | **Were the care providers, participants and outcome assessors blind to treatment allocation?** | **Were there any unexpected imbalances in drop-outs between groups?** | **Is there any evidence to suggest that the authors measured more outcomes than they reported?** | **Did the analysis include an intention-to-treat analysis? If so, was this appropriate and were appropriate methods used to account for missing data?** |
| --- | --- | --- | --- | --- | --- | --- | --- | --- |
|
| Mahlangu 2018  (published after  the SLR update read out) | HAVEN3; NCT02847637 |  |  |  |  |  |  |  |
| Kavakli 2015,  Fujii 2016 | LEOPOLD 2; NCT01233258 |  |  |  |  |  |  |  |
| Mahlangu 2014 | A-LONG; NCT01181128 |  |  |  |  |  |  |  |
| Manco-Johnson 2013 | SPINART, NCT00623480 |  |  |  |  |  |  |  |

Key: Green, low risk; red, high risk; orange, not clear.

NCT, National Clinical Trial; NICE, National Institute for Health and Care Excellence; NMA, network meta-analysis.

Source: NICE [3]

Supplementary Table 5. NIH critical appraisal of case series studies (or single arm studies).
A: Questions 1 to 5

| **Author and year** | **Study acronym or NCT number** | **1. Was the study question or objective clearly stated?** | | **2. Was the study population clearly and fully described, including a case definition?** | | **3. Were the cases consecutive?** | | **4. Were the subjects comparable?** | | **5. Was the intervention clearly described?** | |
| --- | --- | --- | --- | --- | --- | --- | --- | --- | --- | --- | --- |
| **Yes, No, Other (CD, cannot determine; NA, not applicable;  NR, not reported)** | **Justification** | **Yes, No, Other (CD, cannot determine; NA, not applicable;  NR, not reported)** | **Justification** | **Yes, No, Other (CD, cannot determine; NA, not applicable;  NR, not reported)** | **Justification** | **Yes, No, Other (CD, cannot determine; NA, not applicable;  NR, not reported)** | **Justification** | **Yes, No, Other (CD, cannot determine; NA, not applicable;  NR, not reported)** | **Justification** |
| Valentino 2012 | NCT00243386 | Yes | Objective is clearly stated | Yes | Inclusion criteria and subjects’ characteristics clearly explained | CD |  | Yes |  | Yes | Dose and dose adjustments explained |

B: Questions 6 to 9

| **Author and year** | **Study acronym or NCT number** | **6. Were the outcome measures clearly defined, valid, reliable, and implemented consistently across all study participants?** | | **7. Was the length of follow-up adequate?** | | **8. Were the statistical methods well-described?** | | **9. Were the results well-described?** | | **Quality rating** | |
| --- | --- | --- | --- | --- | --- | --- | --- | --- | --- | --- | --- |
| **Yes, No, Other (CD, NA, NR)** | **Justification** | **Yes, No, Other (Other (CD, NA, NR)** | **Justification** | **Yes, No, Other (Other (CD, NA, NR)** | **Justification** | **Yes, No, Other (Other (CD, NA, NR)** | **Justification** | **Good, Fair, Poor** | **If POOR, please state why** |
| Valentino 2012 | NCT00243386 | Yes | Mean annualized bleeding rates, median annualized bleeding rates | Yes | On-demand: 6 months Prophylactic: 12 months | Yes | Median differences of ABRs and percentage reductions of ABRs between treatment regimens were evaluated using the non-parametric Wilcoxon s signed-rank test with each test performed at a 5% alpha level and adjusted for multiple testing (0.05 ‚ number of tests), with no P-value > 0.01 considered statistically significant. The comparisons between on-demand and prophylaxis were paired as each subject was first treated on-demand and then on prophylaxis. | Yes | Mean annualized bleeding rates, median annualized bleeding rates, hemostatic efficacy/ratings well explained | Good |  |

CD, cannot determine; NA, not applicable; NCT, National Clinical Trial; NIH, National Institutes of Health; NR, not reported

Source: NIH [4]

## Methods: NMA

### Supplementary Text 2. Outcome of interest for the NMA.

The patient, intervention, comparator, outcome- (PICO)-based search criteria used in the SLR were broad. However, for the NMA, only one major efficacy outcome was considered of interest in the first instance, based on its importance in hemophilia A: total treated bleeds.

Bleeding events are common primary endpoints in studies in Hemophilia A, based on bleeding being the main clinical symptom in individuals with the disease [5]. Bleeding and its complications negatively affect the quality of life of individuals with Hemophilia A. The model inputs for bleeding events are provided in Supplementary Table 6.

Our model used the assumption that the outcomes were defined in the same way across all studies. However, the definition and reporting of a “bleed” is likely to have differed between studies [5]. Bleeding events are generally reported by patients, and there is no agreed standard regarding the definition and reporting of bleeding outcomes. There are substantial differences in how bleeding frequency is measured and reported in studies. In studies with very short follow-up periods, measurement of events may have been inaccurate if the bleeding frequency was low or was affected by seasonal variation.

Beyond the definition of a bleed itself, one must also account for the variation in each bleeding episode’s treatment. This appeared as more or less clear in the different included studies (Supplementary Table 7), and we have therefore run a sensitivity analysis to address this point.

### Supplementary Table 6. Input data to the NMA models.

| **Trial ID** | **Source publication** | **Treatment** | **Variable** | **Value** | **Detailed calculation (where available)** | **Variables modelled in the NMA** |
| --- | --- | --- | --- | --- | --- | --- |
| A-LONG |  | FVIII prophylaxis | exposure | 12.38 | (23*28)/52 | x |
| Shapiro 2017, Table 1 | nbleeds | 92.00 |  | x |
| Shapiro 2017 | npat | 23 |  |  |
| Mahlangu 2014 | durcontrolperiod | 28 |  |  |
|  | On-demand FVIII | exposure | 12.78 | (23*28.9)/52 | x |
| Shapiro 2017, Table 1 | nbleeds | 456.00 |  | x |
| Shapiro 2017 | npat | 23 |  |  |
| Mahlangu 2014 | durcontrolperiod | 28.9 |  |  |
| HAVEN 3 | From IPD [6] | Emicizumab prophylaxis QW | exposure | 22.10 |  | x |
| nbleeds | 37.00 |  | x |
| Emicizumab prophylaxis Q2W | exposure | 22.30 |  | x |
| nbleeds | 32.00 |  | x |
| On-demand FVIII | exposure | 8.18 |  | x |
| nbleeds | 369.00 |  | x |
| LEOPOLD2 | Kavakli 2015 [7] | FVIII prophylaxis | exposure | 59.00 | (59*52)/52 | x |
| nbleeds | 293.00 |  | x |
| npat | 59 |  |  |
| durcontrolperiod | 52 |  |  |
| On-demand FVIII | exposure | 21.00 | (21*52)/52 | x |
| nbleeds | 1204.00 |  | x |
| npat | 21 |  |  |
| durcontrolperiod | 52 |  |  |
| SPINART | Manco-Johnson 2017 [8] | FVIII prophylaxis | exposure | 127.44 | (42*157.79)/52 | x |
| nbleeds | 264.00 |  | x |
| npat | 42 |  |  |
| durcontrolperiod | 157.79 | 1104.5/7 |  |
| On-demand FVIII | exposure | 126.58 | (42*156.71)/52 | x |
| nbleeds | 4338.00 |  | x |
| npat | 42 |  |  |
| durcontrolperiod | 156.71 | 1097/7 |  |
| Valentino 2012 | Valentino 2012 [9] | FVIII prophylaxis | exposure | 31.68 | 11571/365.25 | x |
| nbleeds | 104.00 |  | x |
| On-demand FVIII | exposure | 33.51 | 12241/365.25 | x |
| nbleeds | 1640 |  | x |

Base case and SA1 (fixed effect) includes: A-LONG, HAVEN3, LEOPOLD II, SPINART

SA2 (including only trials reporting known treated bleeds) includes: A-LONG, HAVEN3, SPINART

SA3 (including single arm trial in addition to base case) includes: A-LONG, HAVEN3, LEOPOLD II, SPINART, Valentino et al 2012

Exposure (in patient years): ((number of patients (npat) * duration of controlled period in weeks (durcontrolperiod))/52 weeks)

durcontrolperiod, duration of controlled period (in weeks); IPD, individual patient data from HAVEN 3; nbleeds, number of bleeds; npat, number of patients; SA, sensitivity analysis.

### *Supplementary Table 7. Definitions of total treated bleeds*.

| **Trials** | **Definition as written in source publication** | **Clear or unclear** |
| --- | --- | --- |
| A‑LONG | A standardized definition of a bleeding episode was used in this study. A bleeding episode started from the first sign of bleeding and ended 72 hours after the last treatment for the bleeding, within which any symptoms of bleeding at the same location or injections less than or equal to 72 hours apart, were considered the same bleeding episode. Any injection to treat the bleeding episode, more than 72 hours after the preceding one, was considered the first injection to treat a new bleeding episode at the same location. Any bleeding at a different location was considered a separate bleeding episode regardless of time from last injection. This definition has been proposed by the Subcommittee on Standards and Criteria, FVIII/FIX subcommittee of the International Society of Thrombosis and Hemostasis, and has been used by the PedNet multicenter study in hemophilia.[10,11] | clear |
| HAVEN 3 | **treated bleeds**: all bleeds followed directly by a "treatment for bleed", irrespective of the time between the treatment and the preceding bleed. Bleeds due to surgery/procedure are excluded. Two bleeds of the same type (e.g., “joint,” “muscle,” or “other”) and at the same anatomical location were considered to be one bleed if the second occurred within 72 hours from the last treatment for the first bleed (“72 hour rule”).  **all bleeds:** number of bleeds in the database (including surgery/procedure, 72-hour rule not implemented) (Roche data on File, HAVEN3). | clear |
| LEOPOLD 2 | No clear definition of a bleed located.[12] | unclear |
| SPINART | “A BE [bleeding episode] was defined as any episode of external bleeding (i.e, epistaxis), bruising, pain or limited function for which FVIII was infused. A joint BE (subset of total BEs) was defined as an event with pain, swelling, tingling, warmth or limited motion of an extremity for which FVIII was infused.”[8] | clear |
| Valentino 2012 | No clear definition of a bleed located[9] | unclear |

## Methods: Subgroup analysis of the intra-patient comparison of the HAVEN 3 trial

### Supplementary Text 3. Algorithms for selecting patients for the European label group.

The European label group was used for the German benefit assessment of emicizumab (Hemlibra®) and was comprised a patient population selected according to the following inclusion criteria and algorithms:

1. Patients were ‘in-label’.
   1. Use prescription information to calculate weekly dose (same for all weeks).
   2. For short acting factor VIII (FVIII; Advate® [13], Kovaltry® [14], Kogenate® [15], NovoEight® [16], ReFacto AF® [17]), patient was in-label if total weekly prescribed dose was at least 47 IU/kg and no more than 140 IU/kg.
   3. For long acting FVIII (Elocta/Eloctate® [18]), patient is in-label if total weekly prescribed dose at least 35 IU/kg and no more than 152 IU/kg
2. Weekly dose in-label at least 80% of weeks.
   1. Calculate daily dose per kg for each patient if data are missing.
   2. Derive week number.
   3. Get the total weekly dose for each week using points a) and b).
   4. Check each week – for short-acting FVIII, if total weekly dose was at least 47 IU/kg then week was in-label. For long-acting FVIII, if total weekly dose was at least 35 IU/kg then week was in-label.
   5. Calculate percentage of weeks in label.
   6. Flag patients with ≥ 80% weeks in label.
3. At least 80% of weeks with no treatment interruptions.
   1. Calculate the difference in days between each dosing.
   2. Week was considered to have a treatment interruption if difference in days:
      1. (a) was more than 3 days for short-acting FVIII and more than 5 days for long-acting FVIII within the week
      2. (a) was more than 3 days or more than 5 days in the beginning of the week (no dose in the first 3 or 5 days)
      3. (a) was more than 3 days or more than 5 days in the end of the week (no dose in the last 3 or 5 days)
      4. interruption happened between weeks and no dose on the first day of second week
      5. there were 2 or 4 days with no dosing during the first week
      6. no doses occurred during the week.

## Results: SLR

### Supplementary Figure 1. PRISMA flow chart of study selection process.


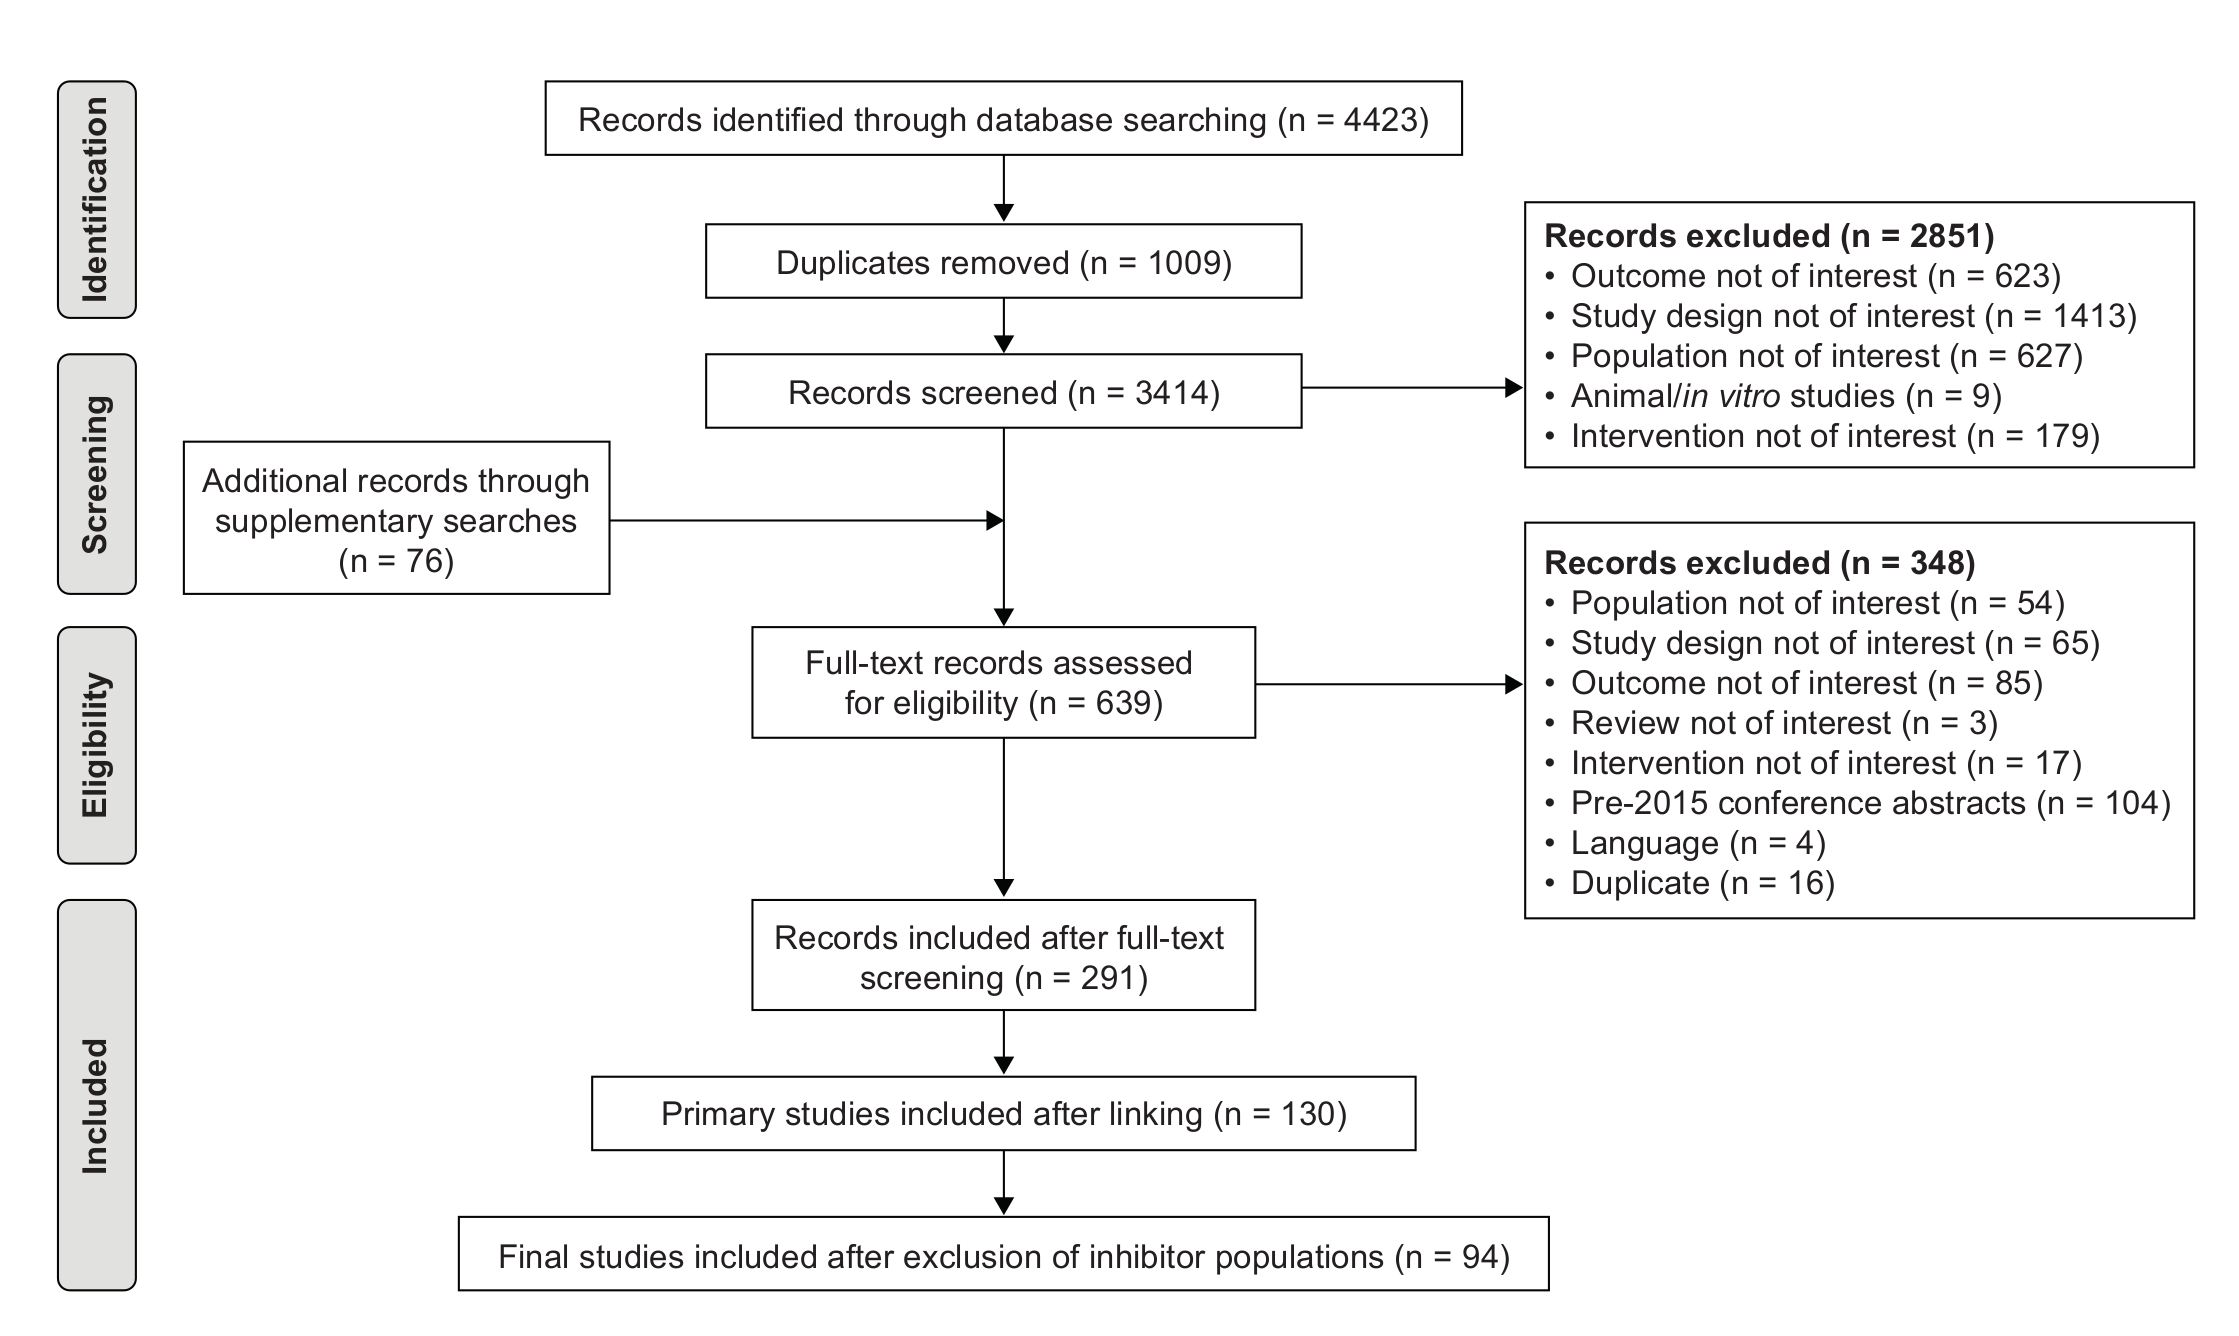


Searches include an original SLR (run in December 2016) and an SLR update (run in May 2018).

PRISMA, Preferred Reporting Items for Systematic Reviews and Meta-Analyses; SLR, systematic literature review.

## Results: NMA

### Supplementary Figure 2. Flow diagram of studies included in NMA.


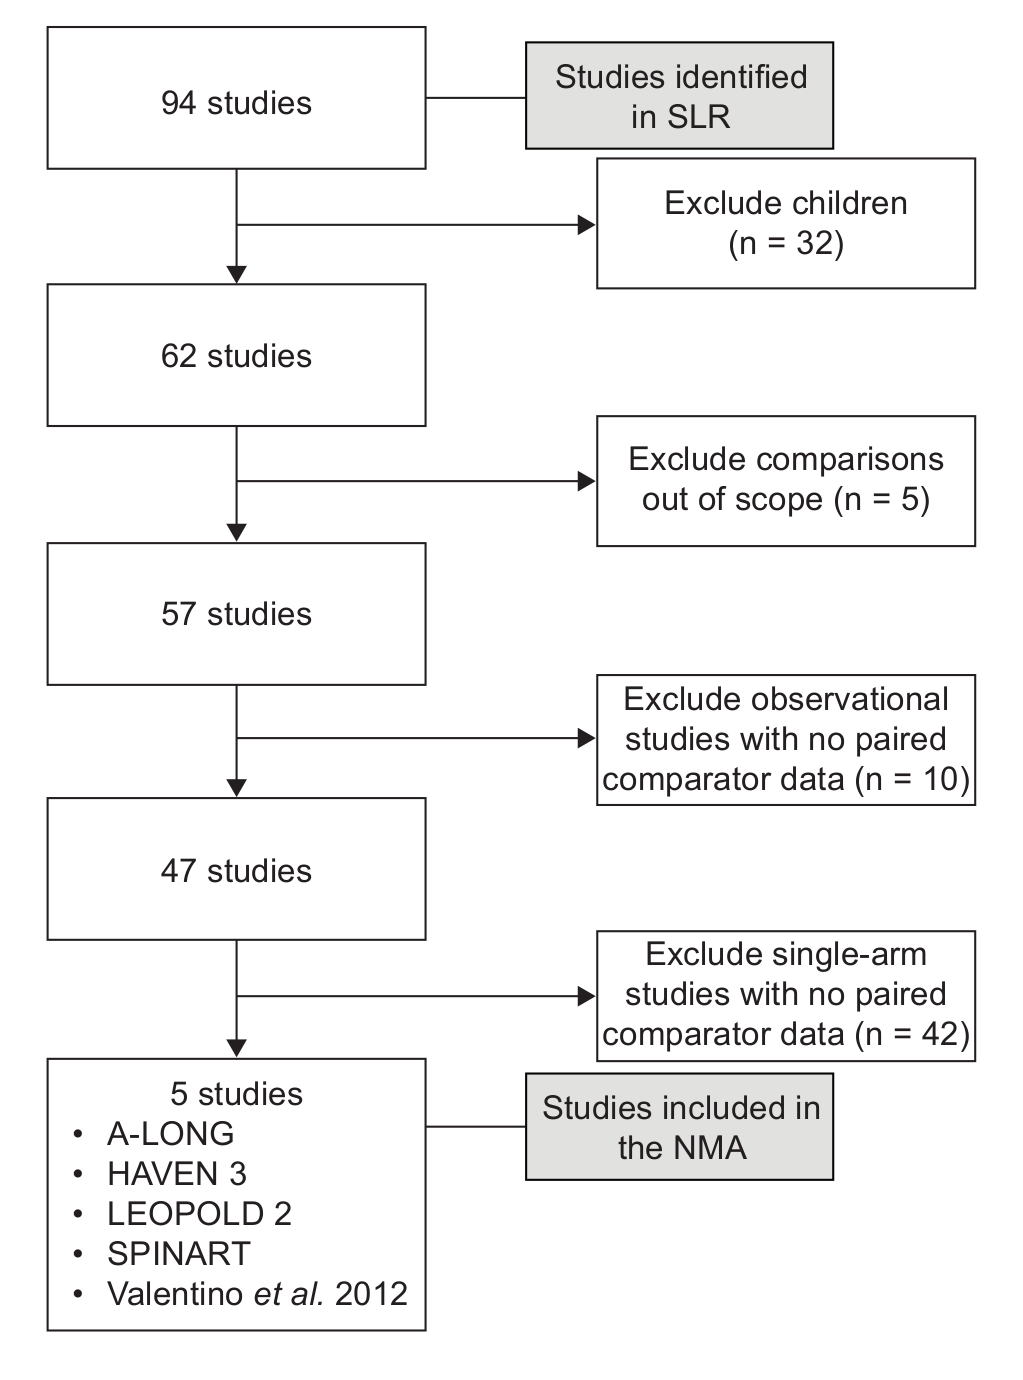


The study by Valentino *et al*. was included in SA3; the four remaining studies were included in the base-case NMA and in SA1 and SA2.

NMA, network meta-analysis; SA, sensitivity analysis; SLR, systematic literature review.

### Supplementary Text 4. Selection of trials for the NMA.

94 studies were identified in the SLR targeting Hemophilia A adults without inhibitors, but only four studies (five including HAVEN 3) were included in this NMA. For one study (A-LONG) only part was randomized and only this part was considered. We were only interested in comparisons of prophylaxis versus on demand/no prophylaxis. Further, NMA methodology requires the use of randomized data, i.e. relative effect summary information with no or limited unknown or unmeasured bias or confounding due to treatment allocation. These criteria alone excluded 74 single arms studies, non-randomized studies and observational studies, or post-marketing surveillance studies from eligibility.

As we are only interested in comparisons of prophylaxis versus on demand/no prophylaxis, Arm D from HAVEN 3 does not qualify for inclusion. We also excluded studies in pediatric populations in order to ensure that the trials included in our NMA would match our HAVEN 3 trial target population as closely as possible. As such another 11 studies were excluded (32 studies of the 94 were in children).

One exception was made to the rule about including only relative effects extracted from randomized trials in our NMA for one of the sensitivity analyses. Indeed, Valentino et al. 2012 [19] is a longitudinal, non-randomized, cross-over comparison and provides an effect estimate of on demand and prophylaxis treatments on Advate. Each subject was first treated on-demand for 6 months and then on prophylaxis for 12 months, and statistical comparisons between these regimens were paired. While not as robust as evidence coming from a well conducted RCT, the gold standard in terms of unbiased evidence—each subject was first treated on-demand and then on prophylaxis, and the comparisons between on-demand and prophylaxis were paired. This level of evidence – much like our Arm D non-interventional study (NIS) in HAVEN3, technically an observational study – can be considered a higher grade of evidence than effect estimates from parallel design non-randomized studies. As such we have included this data in a sensitivity analysis.

Supplementary Figure 2 illustrated the selection process that lead us from 94 identified in the SLR to five trials eligible for the NMA. Supplementary Table 8 lists each of these 94 studies and the reason for its inclusion or exclusion from the NMA.

### Supplementary Table 8. Study design characteristics and reason for inclusion/exclusion of studies in the NMA (hemophilia A - non-inhibitor population) (n=94).

| **ID** | **Study** | **Study type** | **Treatment** | **E/ P** | **N** | **Study duration** | **Study country** | **Primary publication** | **Linked publications** | **Inclusion for NMA, or reason for exclusion** |
| --- | --- | --- | --- | --- | --- | --- | --- | --- | --- | --- |
| 1 | LEOPOLD I  (NCT01029340) | RCT | BAY 81-8973 based on CS/EP then CS/ADJ vs.  BAY 81-8973 based on CS/ADJ then CS/EP | P  P | 30  32 | 12 months (optional extension: 12 months) | North America, Europe, Israel, South Africa and Asia | [20] | [21]; [22]; [23] | prophylaxis vs prophylaxis |
| 2 | LEOPOLD 2 (NCT01233258) | RCT | BAY 81-8973, low-dose vs.  BAY 81-8973 high-dose vs.  BAY 81-8973 | P  P  E | 28  31  21 | 12 months | Europe, South Africa, North America, South America, and Asia | [12] | [23]; [24] | INCLUDED |
| 3 | LEOPOLD KIDS (NCT01311648) | Single arm | BAY 81-8973 | P | 51 | 6-8 months | Bulgaria, Canada, Denmark, Hungary, Ireland, Israel, Italy, Latvia, Lithuania, Poland, Romania, US | [25] | [26] | <12 years; single arm |
| 4 | A-LONG (NCT01181128) | Parallel assignment (Partially randomized) | rFVIIIFc (Individualized prophylaxis) vs.  rFVIIIFc (Weekly prophylaxis) vs.  rFVIIIFc (Episodic treatment) | P  P  E | 118  24  23 | 32.1 weeks (median)  28 weeks (median)  28.9 weeks (median) | Europe, North America and others (Australia, New Zealand, Brazil, Hong Kong, India, Japan, Russia, and South Africa) | [27] | [28]; [29]; [30]; [31]; [32] | INCLUDED |
| 5 | Kids A-LONG (NCT01458106) | Single arm | rFVIIIFc | P | 71 | 26.3 weeks | NR | [33] | [34]; [35]; [36]; [37]; [31]; [32] | <12 years; single arm |
| 6 | ASPIRE (NCT01454739)  (extension to A-LONG) | Parallel assignment | rFVIIIFc (Individualized prophylaxis) vs.  rFVIIIFc (Weekly prophylaxis) vs.  rFVIIIFc (Modified prophylaxis) vs.  rFVIIIFc (Episodic treatment) | P  P  P  E | 109  27  17  14 | 80.9 weeks | NR | [38] | [39]; [40]; [41]; [42]; [43]; [44]; [45]; [46]; [47]; [48]; [49]; [50]; [51]; [52]; [53] | non-randomized study |
| 7 | Guardian 1  (NCT00840086) | Single arm | Turoctocog alfa | P | 150 | 29 months (long term follow-up: 29 months) | Brazil, Croatia, Germany, Israel, Italy, Japan, Malaysia, the Russian Federation, Serbia, Spain, Switzerland, Taiwan, Turkey, UK, US | [54] | [55]; [56] | single arm |
| 8 | Guardian 2 (NCT00984126) | Single arm | Turoctocog alfa (NovoEight) | P & E | 199 | NR | Brazil, Croatia, Germany, Israel, Italy, Japan, Latvia, Lithuania, Macedonia, Malaysia, Poland, Russian Federation, Republic of Serbia, Spain, Switzerland, Taiwan, Turkey, UK, US | [57]; [58] | [59]; [60]; [61]; [62]; [63]; [64]; [65] | single-arm study, without paired comparison of OD and prophylaxis |
| 9 | Guardian 3 (NCT01138501) | Single arm | Turoctocog alfa | P & E | 63 | 4.5 months (long term follow-up: 4.5 months) | Brazil, Italy, Lithuania, Macedonia, Malaysia, Poland, the Russian Federation, Serbia, Taiwan, Turkey, US | [66] | [56] | <12 years; single arm |
| 10 | Glamocanin 2015 | Single arm | rFVIII (turoctocog alfa) | P | 5 | NR | NR | [67] | - | <12 years; single arm |
| 11 | Pathfinder 2 (NCT01480180) | Single arm | Turoctocog alfa pegol (N8-GP); glycoPEGylaged recombinant factor VIII | P & E | 186 | ≥ 50 ED | Croatia, Denmark, France, Germany, Hungary, Italy, Netherlands, Norway, Russia, Spain, Sweden, Switzerland, UK, Australia, Brazil, Israel, Japan, Republic of Korea, Malaysia, Taiwan, Turkey and country/countries from North America | [68] | - | single arm study, without paired comparison of OD and prophylaxis |
| 12 | Pathfinder 5 | Single arm | N8 GP - (turoctocog alfa pegol) | P & E | 68 | 26 weeks | NR | [69] | - | <12 years; single arm |
| 13 | SPINART (NCT00623480) | RCT | rFVIII-FS  rFVIII-FS | E  P | 42  42 | 1 year | US, Bulgaria, Romania, Argentina | [8,70] | [71]; [72]; [73]; [74] | INCLUDED |
| 14 | Kreuz 2005 | Single arm | rFVIII-FS (Kongenate FS, Bayer) | P & E | 61 | 3.5 years | Europe, Israel, North America | [75] | - | <12 years; single arm |
| 15 | Shi 2007 | Single arm | rFVIII-FS (Kogenate FS) | P | 49 | NR | China | [76] | - | <12 years; single arm |
| 16 | Vdovin 2011 | Parallel assignment | Kogenate (rFVIII-FS) – Regimen 1  Kogenate (rFVIII-FS) – Regimen 2  Kogenate (rFVIII-FS) – Regimen 3 | P  P  P | 11  13  8 | 9 months | Russia | [77] | - | prophylaxis vs prophylaxis |
| 17 | Collins 2010 | Single arm | rFVIII-FS (Kogenate FS/KOGENATE Bayer) | P & E | 20 | 13 months | US and Europe | [78] | - | single arm |
| 18 | LIPLONG | Single arm | rFVIII-FS | P | 72 | 52 weeks | Austria, Belgium, Canada, Croatia, Denmark, France, Germany, Israel, Italy, Norway, Poland, Spain, Netherlands, Turkey, UK, US | [79] | [80] | single arm |
| 19 | Yoshioka 2001 | Single arm | rFVIII-FS (Bayer) | E | 20 | 41.6 weeks | NR | [81] | - | single arm |
| 20 | Abshire 2000 | Single arm | rFVIII-FS | P & E | 71 | 24 weeks (Long term follow-up: 24 months (EU), 18 months (NA)) | US and North America | [82] | - | single arm |
| 21 | Giangrande 2002 | Single arm | Kogenate - factor VIII | P & E | 31 | At least 2 years and at least 20 EDs | 7 European countries and Israel | [83] | - | <12 years; single arm |
| 22 | Manco-Johnson 2007 | RCT | Recombinant factor VIII (Kogenate or Kogenate FS, Bayer HealthCare))  Recombinant factor VIII (Kogenate or Kogenate FS, Bayer HealthCare)) | P  E | 32  33 | Mean period of participation: 49 months | NR | [84] | - | <12 years |
| 23 | Zhao 2015 | Single arm | rfVIII-FS (Bayer’s sucrose formulated recombinant factor VIII) | P & E | 30 | 12 weeks on- demand then 12 weeks prophylaxis | China | [85] | - | single arm |
| 34 | Shirahata 2000 | Single arm | BAY 14-2222; Kogenate-FS | P | 5 | 4 weeks | Japan | [86] | - | single arm |
| 24 | Lusher 2004 | Single arm | rFVIII (Kogenate, Bayer) | P & E | 102 | 4.2 years | Europe, North America | [87] | - | single arm |
| 25 | Lusher 1993 | Single arm | rFVIII (Kogenate, Bayer) | P & E | 95 | 1.5 years | NR | [88] | - | <12 years; single arm |
| 26 | ESPRIT | RCT | rFVIII  rFVIII | P  E | 21  19 | 10 years | Italy | [89] | - | <12 years |
| 27 | Arkin 1991 | Single arm | rFVIII | E | 41 | NR | NR | [90] | - | single arm |
| 28 | White 1997 | Single arm | rFVIII (Recombinate) | P & E | 69 | 3.5 years | NR | [91] | - | single arm |
| 29 | Karimi 2015 | Single arm | rFVIII (Kogenate, Bayer) | P | 16 | NR | Iran | [92] | - | <12 years; single arm |
| 39 | Bray 1994 | Single arm | r-FVIII | E | 79 | 35 months | US | [93] | - | <12 years; single arm |
| 69 | Auerswald 2012 | Single arm | Advate rAHF-PFM | P & E | 55 | 3 years | NR | [94] | - | <12 years; single arm |
| 70 | Tarantino 2004 | Single arm | rAHF-PFM (Recombinate) | P | 107 | 75 days | Austria | [95] | - | single arm |
| 71 | Valentino 2012 | Single arm | ADVATE Antihemophilic Factor (Recombinant), Plasma/Albumin Free Method | P & E | 66 | 12 months prophylaxis and 6 months on-demand | US, Europe | [19] | - | INCLUDED in sensitivity analysis; single arm with paired comparative (prophylaxis vs OD) data |
| 83 | Aygören-Pürsün 1997 | Single arm | rFVIII (Kogenate, Bayer) | P & E | 39 | 1 year | Germany | [96] | - | single arm |
| 30 | Lindvall 2012 | Randomized, crossover | FVIII or FIX (standard prophylactic dosing)  or  FVIII or FIX (daily dosing) | P | 13 | 24 months (2 x 12 months) | Sweden | [97] | - | prophylaxis vs prophylaxis |
| 111 | Petrini 2001 | Single arm | FVIII; IX | P | 46 | 1 year | Sweden | [98] |  | <12 years |
| 32 | Gulshan 2016 | Single arm | Clotting Factor Concentrate (CFC) | P | 20 | 3 months | India | [99] | - | single arm |
| 31 | Verma 2016 | Parallelgroup, randomized | Factor VIII  Factor VIII | P  E | 11  10 | 11.5 months | India | [100] | - | <12 years |
| 40 | Crivianu-Gaita 2016 | Single arm | FVIII | P | 14 | 8 months | Canada | [101] | - | single arm |
| 33 | Powell 2000 | Single arm | Koate-DVI | P & E | 36 | 6 months | US | [102] | - | single arm |
| 35 | Lopez 2015 | Single arm | Moroctocog alfa (AF-CC) | NR | 208 | NR | Austria, Belgium, Denmark, Finland, France, Germany, Greece, Hungary, Italy, Netherlands, Romania, Spain, Sweden, UK | [103] | - | single arm |
| 37 | Shiller 2015 | Single arm | Moroctocog alfa (Octofactor) | P | 12 | 21±1 weeks | NR | [104] | - | single arm |
| 41 | NCT00868530 | Single arm | Xyntha | E | 53 | 6 months | China | [105] | - | single arm |
| 62 | Courter 2001 | Single arm | B-domain deleted recombinant factor VIII (BDDrFVIII) | P & E | 101 | 5 years (long term follow-up: 5 years) | NR | [106] | - | single arm |
| 63 | Courter 2001 | Single arm | B-domain deleted recombinant factor VIII (BDDrFVIII) | P & E | 113 | 12 months (long term follow-up: 12 months) | Europe and US | [107] | - | <12 years; single arm |
| 48 | Klamroth 2015 | Single arm | Human-Cl rFVIII | P | 66 | NR | Europe | [108] | [109]; [110] | single arm |
| 49 | GENA-03 | Single arm | Nuwiq® (human-cl rhFVIII) | P | 59 | ≥6 months | NR | [111] | - | single arm |
| 50 | Successor study of GENA-03 | Single arm | Human-cl rhFVIII (Nuwiq) | P | 49 | NR | Europe | [112]; [113] | - | single arm |
| 51 | GENA-08 (NCT01125813) | Single arm | Nuwiq (human-cl rhFVIII) | P | 32 | 6 months | Austria, Bulgaria, Germany and the United Kingdom | [114]; [115] | - | single arm |
| 52 | GENA-01 (NCT00989196) | Single arm | Nuwiq (Human-cl rhFVIII) | E | 22 | ≥6 months | US, Germany and Bulgaria | [115] | - | single arm |
| 53 | Nemes 2008/ Nemes 2007 | Single arm | FVIII/VWF (IMMUNATE Solvent/Detergent) | P & E | 56 |  | Germany, Czech Republic, Austria, Hungary, Bulgaria, Poland | [116]; [117] | - | single arm |
| 55 | SWIFTLY-HA study | Parallel assignment | Voncento  Voncento | P  E | 18  17 | 12 months | NR | [118] | - | <12 years |
| 56 | SWIFT-HA study | Single arm | Plasma-derived VWF/FVIII concentrate (VONCENTO®) | P & E | 81 | 6 months | Bulgaria, Macedonia, Poland, Russian Federation | [119] | - | single arm study, without paired comparison of OD and prophy |
| 57 | SIPPET (NCT01064284) | RCT | Plasma-derived factor VIII containing von Willebrand factor  recombinant factor VIII | P & E  P & E | 125  126 | NR | NR | [120] | - | <12 years |
| 58 | Dmoszynska 2011 | Single arm | FVIII and VWF concentrate (Optivate) | P & E | 70 | 2 years (long term follow-up: 2 years) | Poland, UK | [121] | - | single arm |
| 59 | Matysiak 2011 | Single arm | Optivate (FVIII/VWF) | P & E | 30 | 26 weeks (long term follow-up: 26 weeks) | UK | [122] | - | <12 years |
| 60 | PROLONG-ATE | Single arm | BAX 855; pegylated full-length recombinant FVIII (rFVIII) | P & E | 137 | 6 months ± 2 weeks | US, Australia, Austria, Bulgaria, Czech Republic, Germany, Israel, Japan, Korea, Republic of, Lithuania, Malaysia, Netherlands, Poland, Romania, Spain, Sweden, Switzerland, Taiwan, Ukraine, UK | [123] | - | single arm study, without paired comparison of OD and prophy |
| 61 | Mullins 2016 | Single arm | Polyethylene glycol (peg)-ylated FVIII (BAX 855) | P | 66 | 6 months | NR | [124] | - | <12 years; single arm |
| 65 | NCT01568580 | Single arm | Beroctocog alfa | E | 70 | 21 months | Korea | [125] | - | single arm |
| 66 | Ledger 2016 | Single arm | rVIII-SingleChain | P | 81 | NR | NR | [126] | - | <12 years; single arm |
| 67 | AFFINITY  (NCT01486927) | Parallel assignment | rVIII-SingleChain | P  E | 146  27 | NR | NR | [127] | - | non-randomized study |
| 68 | Philipp 2001 | Single arm | Monoclate-P | E | 30 | 6 months (long term follow-up: 24 months) | US, Europe | [128] | - | single arm |
| 72 | Wolf 2004 | Single Arm (Study A)  Single Arm (Study B) | Factor VIII concentrate Haemoctin SDH  Factor VIII concentrate Haemoctin SDH | P & E  P & E | 13 (A)  41 (B) | 9 months  ≥6 months | Poland  Poland | [129] | - | single arm |
| 73 | Vossebeld 2003 | Single arm | AAFACT | P & E | 70 | 4 years | Netherlands | [130] | - | single arm |
| 91 | BB-2155-03/03LT  Lusher 1990 | Single arm | Monoclate | E | 38 | 6 months (long term follow-up: 24 months) | UK, USA, Netherlands, Israel | [131] |  | single arm |
| 74 | PROTECT VIII | Single arm (of parallel assignment) | BAY 94-9027 | P | 112 | 36 weeks | NR | [1] | - | single arm study, without paired comparison of OD and prophylaxis |
| 75 | PROTECT VIII Kids | Single arm | BAY94-9027 | P | 60 | ≥50 days | NR | [132] | - | <12 years; single arm |
| 76 | NCT01775618 | Single arm | BAY 94-9027 | P | 61 | 6 months | NR | [133] | - | <12 years; single arm |
| 87 | Leissinger 2001 | Single arm | High-dose DDAVP (desmopressin acetate) intranasal spray (Stimate®;1.5 mg/mL) | P & E | 124 | Mean duration of participation: 8 months | NR | [134] | - | single arm |
| 92 | 2014082018870N1  Eshgi 2015 | RCT | plasma-derived FVIII  vs.  Safacto (rFVIII) | E  E | 10  10 | 24 hours | Iran | [135] | - | OD vs OD |
| 38 | Smith 2005* | PMS | rFVIII (REFACTO) | P & E | 60 | 6 months | Europe, New Zealand | [136] | - | single arm |
| 54 | Nemes 2012* | PMS | FVIII/VWF product (haemoctin SDH; Biotest) | P & E | 109 | 82.6 months/patient | Germany, Hungary | [137] | - | single arm |
| 78 | Hay 1996* | PMS | Monoclate-P | P | 97 | 284 days | UK | [138] | - | single arm |
| 86 | Yoshioka 2003* | PMS | rFVIII (Kogenate) | E | 43 | 51 months | Japan | [139] | - | single arm |
| 88 | Calvez 2014* | Pharmacosurveillance | rFVIII  rFVIII  rFVIII  rFVIII | NR | 97  111  48  27 | 75 EDs  75 EDs  75 EDs  75 EDs | France | [140] |  | single arm |
| 113 | HAVEN 4 | Single arm | Emicizumab | P | 41 | 6 months | Australia, Belgium, Japan, Poland, Spain, United States | (Internal Roche data) | [141,142] | single arm |
| 114 | Guardian 4 | Single arm | Turoctocog alfa | P | 59 | 4.4 years | NR | [143] | - | <12 years |
| 115 | Zhao 2017 | Single arm | rFVIII-FS (Kogenate) | P & E | 30 | 24 weeks | China | [144] | - | children aged 2–16 years |
| 116 | NHLBI R34 | Pilot RCT | rFVIII | P | 4 | 12 months | US | [145] | - | prophylaxis vs prophylaxis |
| 117 | Karimi 2018 | Single arm | rFVIII (Kogenate) or pdFVIII (Emoclot) | P | 33 | 12 months | Iran | [146] | - | <12 years; single arm |
| 118 | Chozie 2018 | RCT | KOATE-DVI (Antihemophilic Factor VIII) | P & E | 50 | 12 months | Indonesia | [147] | - | children with mean age 11 years |
| 119 | NuPreviq | Single arm | Human-cl rhFVIII (Nuwiq) | P | 66 | 6 months | 8 countries (Austria, Bulgaria, Germany, Hungary, Poland, Romania, Slovakia, and the UK) | [148] | - | single arm |
| 120 | NuProtect study | Single arm | Human-cl rhFVIII (Nuwiq) | P | 66 | 5 years | Belarus, Canada, France, Georgia, Germany, India, Italy, Moldova, Republic of, Morocco, Poland, Portugal, Russian Federation, Slovenia, Spain, Ukraine, United Kingdom, United States | [149] | - | single arm |
| 121 | Klukowska 2018 | Single arm | Octanate | P | 51 | 5 years | NR | [150] | - | single arm |
| 122 | PTP study /PUP study | Single arm | Moroctocog alfa | P & E | 60 | 24 months | 11 European countries (Bulgaria, Finland, Georgia, Greece, Italy, Romania, Serbia, Spain, Sweden, Turkey, Ukraine) | [151] | - | <12 years, single arm |
| 123 | Stasyshyn 2017 | Non-RCT | rVIII-SingleChain | P & E | 84 | 12 months | 19 countries (Europe, the USA and the rest of the world) | [152] | - | <12 years |
| 124 | CHIPS | Single arm | NR | P | 30 | 10 months | China | [153], Wanru 2018 | - | <12 years, single arm |
| 125 | AHEAD study* | Registry | Advate | P & E | 715 | 4 years | 21 countries: Australia, Austria, Belgium, Brazil, Canada, Colombia, Czech Republic, Denmark, France, Greece, Hungary, Italy, Norway, Poland, Portugal, Russia, Slovenia, Spain, Sweden, Switzerland and United Kingdom. | [154] | [155] | registry |
| 126 | ABDR* | Registry | FVIII or FIX | P & E | 718 | 12 months | Australia | [156] | - | registry |
| 127 | Kappa registry* | Registry | NR | P & E | 173 | NR | Denmark, Norway, Sweden | [157] | - | registry |
| 128 | USHTCN* | Registry | NR | P & E | 6196 | 12 years | US | [158] | - | registry |
| 129 | FranceCoag PUP cohort* | Registry | pdFVIII (Factane); rFVIII (Kogenate); rFVIII (Advate) | P & E | 395 | NR | France | [140] | - | <12 years; registry |
| 130 | Dube 2018* | PMS | rFVIII (Xyntha); rVIII (Wilate, Humate-P, Advate, Xyntha) | P & E | 135 | 12 months | Canada | [159] | - | PMS |

*Registry/Postmarketing Surveillance (PMS); E: episodic; P: prophylactic; N: number of patients
Gray shading: 18 new studies picked up in the SLR update (May 2018). None were eligible for the NMA.

Pink shading: studies included in the NMA (base case or sensitivity analysis).

### Supplementary Table 9. SUCRA values for treatments in all NMAs.

| **Study treatment** | **SUCRA, %** | | | |
| --- | --- | --- | --- | --- |
|  | **Base case** | **SA1** | **SA2** | **SA3** |
| Emicizumab Q2W | 86.4 | 91.5 | 87.2 | 85.6 |
| Emicizumab QW | 79.1 | 75.2 | 78.4 | 79.1 |
| FVIII prophylaxis | 34.5 | 33.3 | 34.3 | 35.3 |
| On-demand FVIII | 0.0 | 0.0 | 0.0 | 0.0 |

SUCRA values range from 0% (the treatment is certainly ranked last) to 100% (the treatment is certainly ranked first).

FVIII, factor VIII; NA, not applicable; NMA, network meta-analysis; Q2W, once every 2 weeks; QW, once weekly; SA, sensitivity analysis; SUCRA, Surface Under the Cumulative Ranking Area.

### Supplementary Table 10. Cross-tabulation of rate ratios for total treated bleeds – base-case NMA.

| **Study treatment** | **Rate ratio with 95% credible intervals (row versus column)** | | | |
| --- | --- | --- | --- | --- |
| **On-demand FVIII** | **FVIII prophylaxis** | **Emicizumab QW** | **Emicizumab Q2W** |
| **On-demand FVIII** | NA | 10.01 (6.20, 16.31) | 28.30 (11.93, 68.31) | 31.85 (13.11, 81.01) |
| **FVIII prophylaxis** | 0.10 (0.06, 0.16) | NA | 2.80 (1.06, 7.64) | 3.19 (1.19, 9.21) |
| **Emicizumab QW** | 0.04 (0.01, 0.08) | 0.36 (0.13, 0.95) | NA | 1.13 (0.46, 2.84) |
| **Emicizumab Q2W** | 0.03 (0.01, 0.08) | 0.31 (0.11, 0.84) | 0.88 (0.35, 2.18) | NA |

FVIII, factor VIII; NA, not applicable; NMA, network meta-analysis; Q2W, once every 2 weeks; QW, once weekly.

### Supplementary Figure 3. Heterogeneity assessment via ordinary pairwise meta-analyses, for studies included in NMAs.

A: All base-case studies that evaluated FVIII prophylaxis


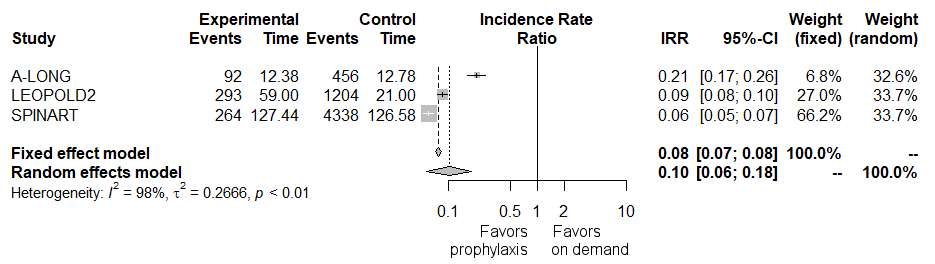


B: All studies in SA3 (allowing inclusion of non-randomized studies) that evaluated FVIII prophylaxis


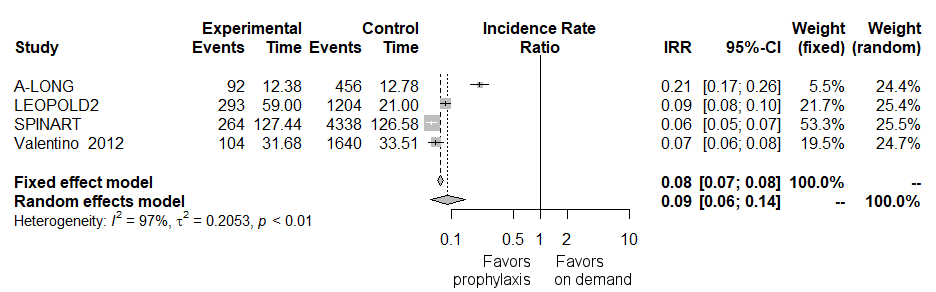


τ2 is the estimated between-study variance. I2 is the proportion of observed variance that is true between-study variance rather than random error (τ2 divided by the sum of τ2 and random error) [160].

Rate ratios compare the rate of treated bleeds between FVIII prophylaxis and no prophylaxis.

I2 values may be interpreted as low heterogeneity (0%–25%), low to moderate heterogeneity (25%–50%), moderate to high heterogeneity (50%–75%) and high heterogeneity (75%–100%).

CI, confidence interval; IRR, incidence rate ratio; NMA, network meta-analysis; SA, sensitivity analysis.

### Supplementary Table 11. Cross-tabulation of rate ratios for total treated bleeds – SA1 network meta-analysis.

| **Study treatment** | **Rate ratio with 95% credible intervals (row versus column)** | | | |
| --- | --- | --- | --- | --- |
| **On-demand FVIII** | **FVIII prophylaxis** | **Emicizumab QW** | **Emicizumab Q2W** |
| **On-demand FVIII** | NA | 12.73 (11.70, 13.80) | 27.70 (20.16, 38.80) | 32.32 (22.98, 46.43) |
| **FVIII prophylaxis** | 0.08 (0.07, 0.09) | NA | 2.18 (1.58, 3.11) | 2.54 (1.79, 3.66) |
| **Emicizumab QW** | 0.04 (0.03, 0.05) | 0.46 (0.32, 0.63) | NA | 1.17 (0.73, 1.84) |
| **Emicizumab Q2W** | 0.03 (0.02, 0.04) | 0.39 (0.27, 0.56) | 0.86 (0.54, 1.37) | NA |

FVIII, factor VIII; NA, not applicable; Q2W, once every 2 weeks; QW, once weekly; SA, sensitivity analysis.

### Supplementary Table 12. Cross-tabulation of rate ratios for total treated bleeds – SA2 network meta-analysis.

| **Study treatment** | **Rate ratio with 95% credible intervals (row versus column)** | | | |
| --- | --- | --- | --- | --- |
| **On-demand FVIII** | **FVIII prophylaxis** | **Emicizumab QW** | **Emicizumab Q2W** |
| **On-demand FVIII** | NA | 9.18 (4.91, 17.33) | 28.17 (11.18, 67.72) | 32.41 (13.51, 81.81) |
| **FVIII prophylaxis** | 0.11 (0.06, 0.20) | NA | 3.04  (1.05, 9.24) | 3.52 (1.22, 10.93) |
| **Emicizumab QW** | 0.04 (0.01, 0.09) | 0.33 (0.11, 0.96) | NA | 1.17 (0.46, 3.07) |
| **Emicizumab Q2W** | 0.03 (0.01, 0.07) | 0.28 (0.09, 0.82) | 0.85 (0.33, 2.19) | NA |

FVIII, factor VIII; NA, not applicable; Q2W, once every 2 weeks; QW, once weekly; SA, sensitivity analysis.

### Supplementary Table 13. Cross-tabulation of rate ratios for total treated bleeds – SA3 network meta-analysis.

| **Study treatment** | **Rate ratio with 95% credible intervals (row versus column)** | | | |
| --- | --- | --- | --- | --- |
| **On-demand FVIII** | **FVIII prophylaxis** | **Emicizumab QW** | **Emicizumab Q2W** |
| **On-demand FVIII** | NA | 11.10 (7.30, 16.92) | 28.33 (11.16, 71.10) | 31.74 (12.67, 79.70) |
| **FVIII prophylaxis** | 0.09 (0.06, 0.14) | NA | 2.52 (0.91, 6.73) | 2.85 (1.04, 7.47) |
| **Emicizumab QW** | 0.04 (0.01, 0.09) | 0.40 (0.15, 1.10) | NA | 1.12 (0.47, 3.07) |
| **Emicizumab Q2W** | 0.03 (0.01, 0.08) | 0.35 (0.13, 0.96) | 0.89 (0.33, 2.15) | NA |

FVIII, factor VIII; NA, not applicable; Q2W, once every 2 weeks; QW, once weekly; SA, sensitivity analysis.

### Supplementary Figure 4. Forest plot of rate ratios for total treated bleeds – SA1 network meta-analysis.


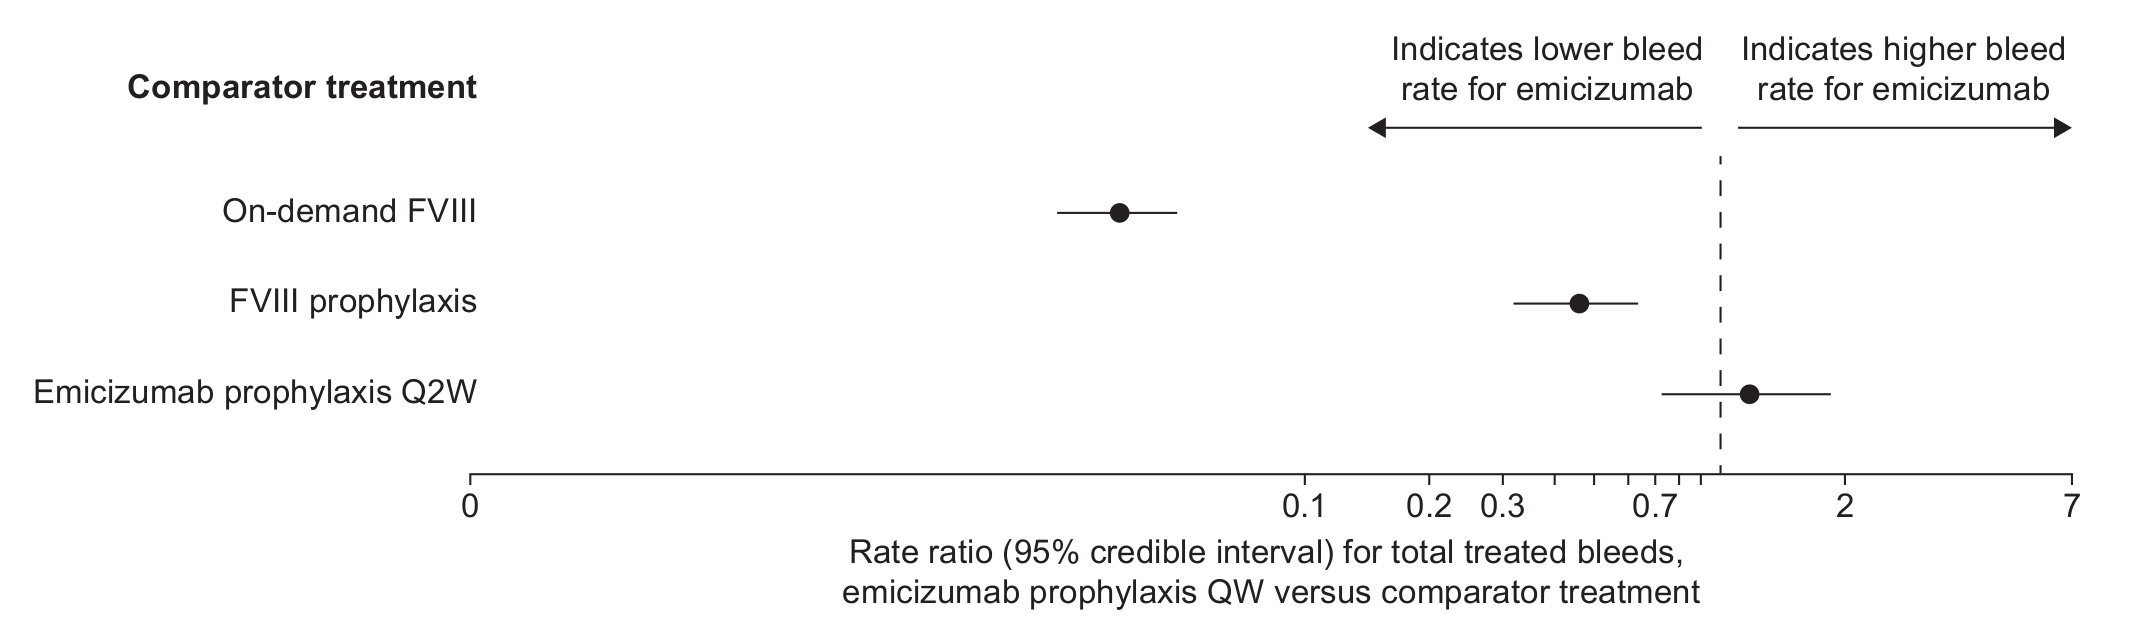


Plot shows ratios (with 95% credible intervals) for total treated bleeds (emicizumab versus all other comparators).

FVIII, factor VIII; Q2W, once every 2 weeks; QW, once weekly; SA, sensitivity analysis.

### Supplementary Figure 5. Forest plot of rate ratios for total treated bleeds – SA2 network meta-analysis.


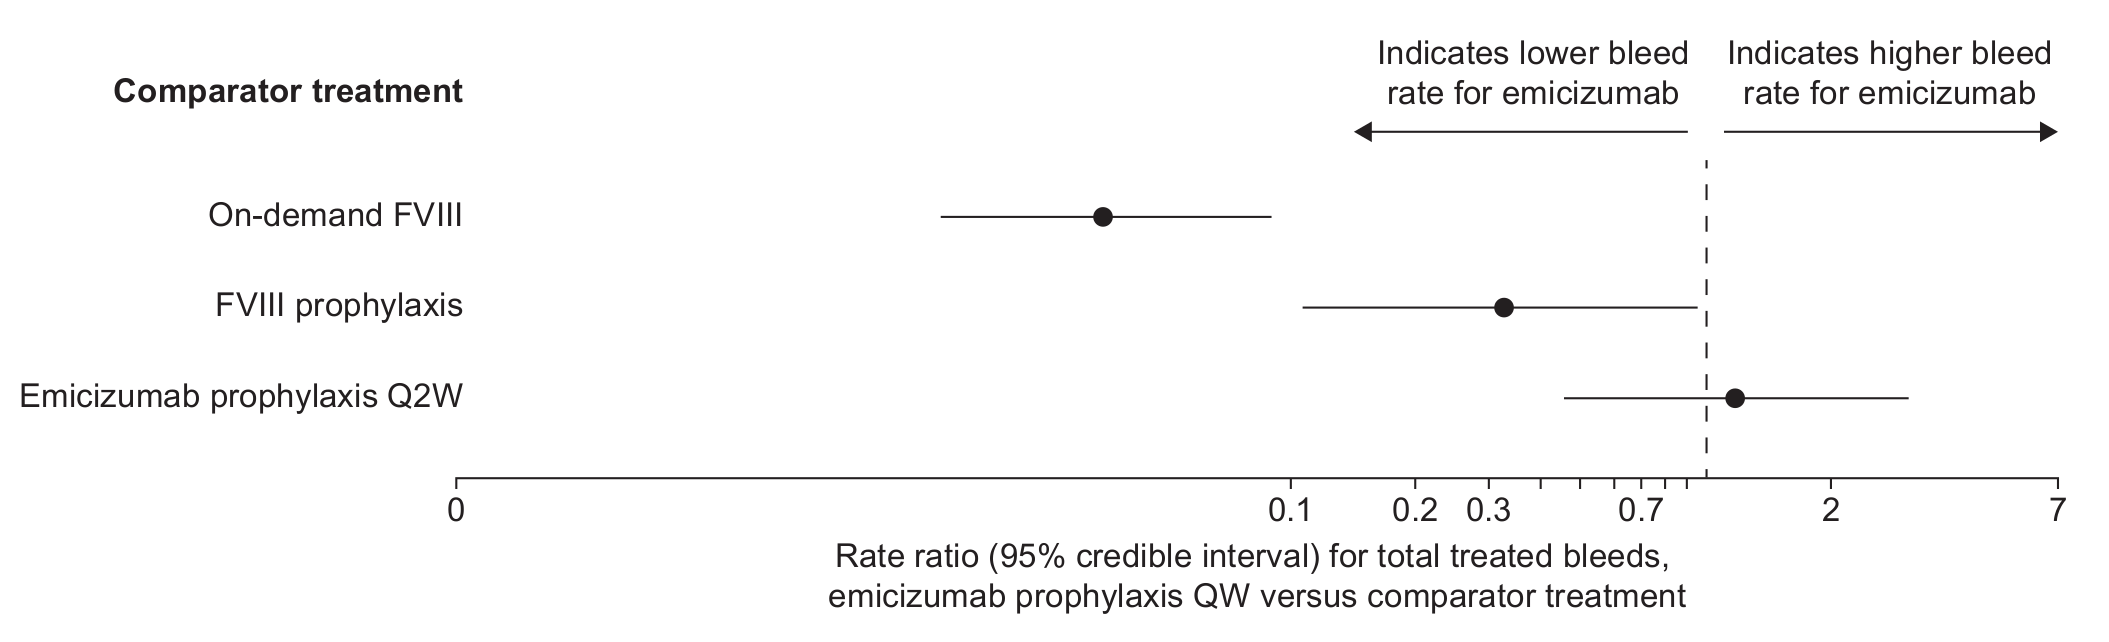


Plot shows ratios (with 95% credible intervals) for total treated bleeds (emicizumab versus all other comparators).

FVIII, factor VIII; Q2W, once every 2 weeks; QW, once weekly; SA, sensitivity analysis.

### Supplementary Figure 6. Forest plot of rate ratios for total treated bleeds – SA3 network meta-analysis.


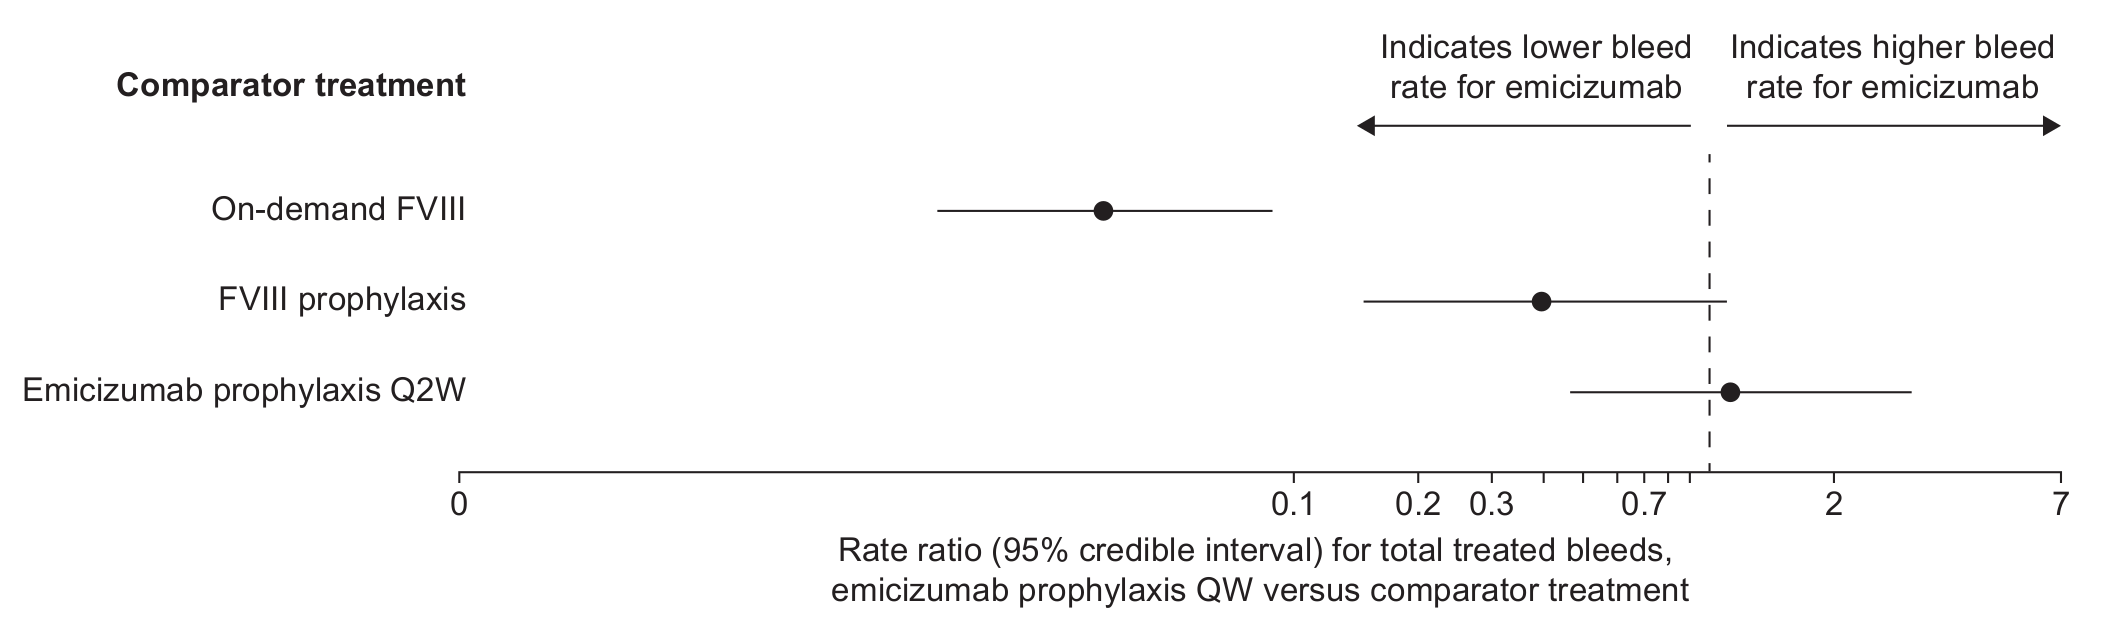


Plot shows ratios (with 95% credible intervals) for total treated bleeds (emicizumab versus all other comparators).

FVIII, factor VIII; Q2W, once every 2 weeks; QW, once weekly; SA, sensitivity analysis.

## Results: Subgroup analysis of the intra-patient comparison of the HAVEN 3 trial

### Supplementary Figure 7. Flow diagrams showing inclusion of patients in HAVEN 3 subgroup analysis.

A: WFH guidelines-based group


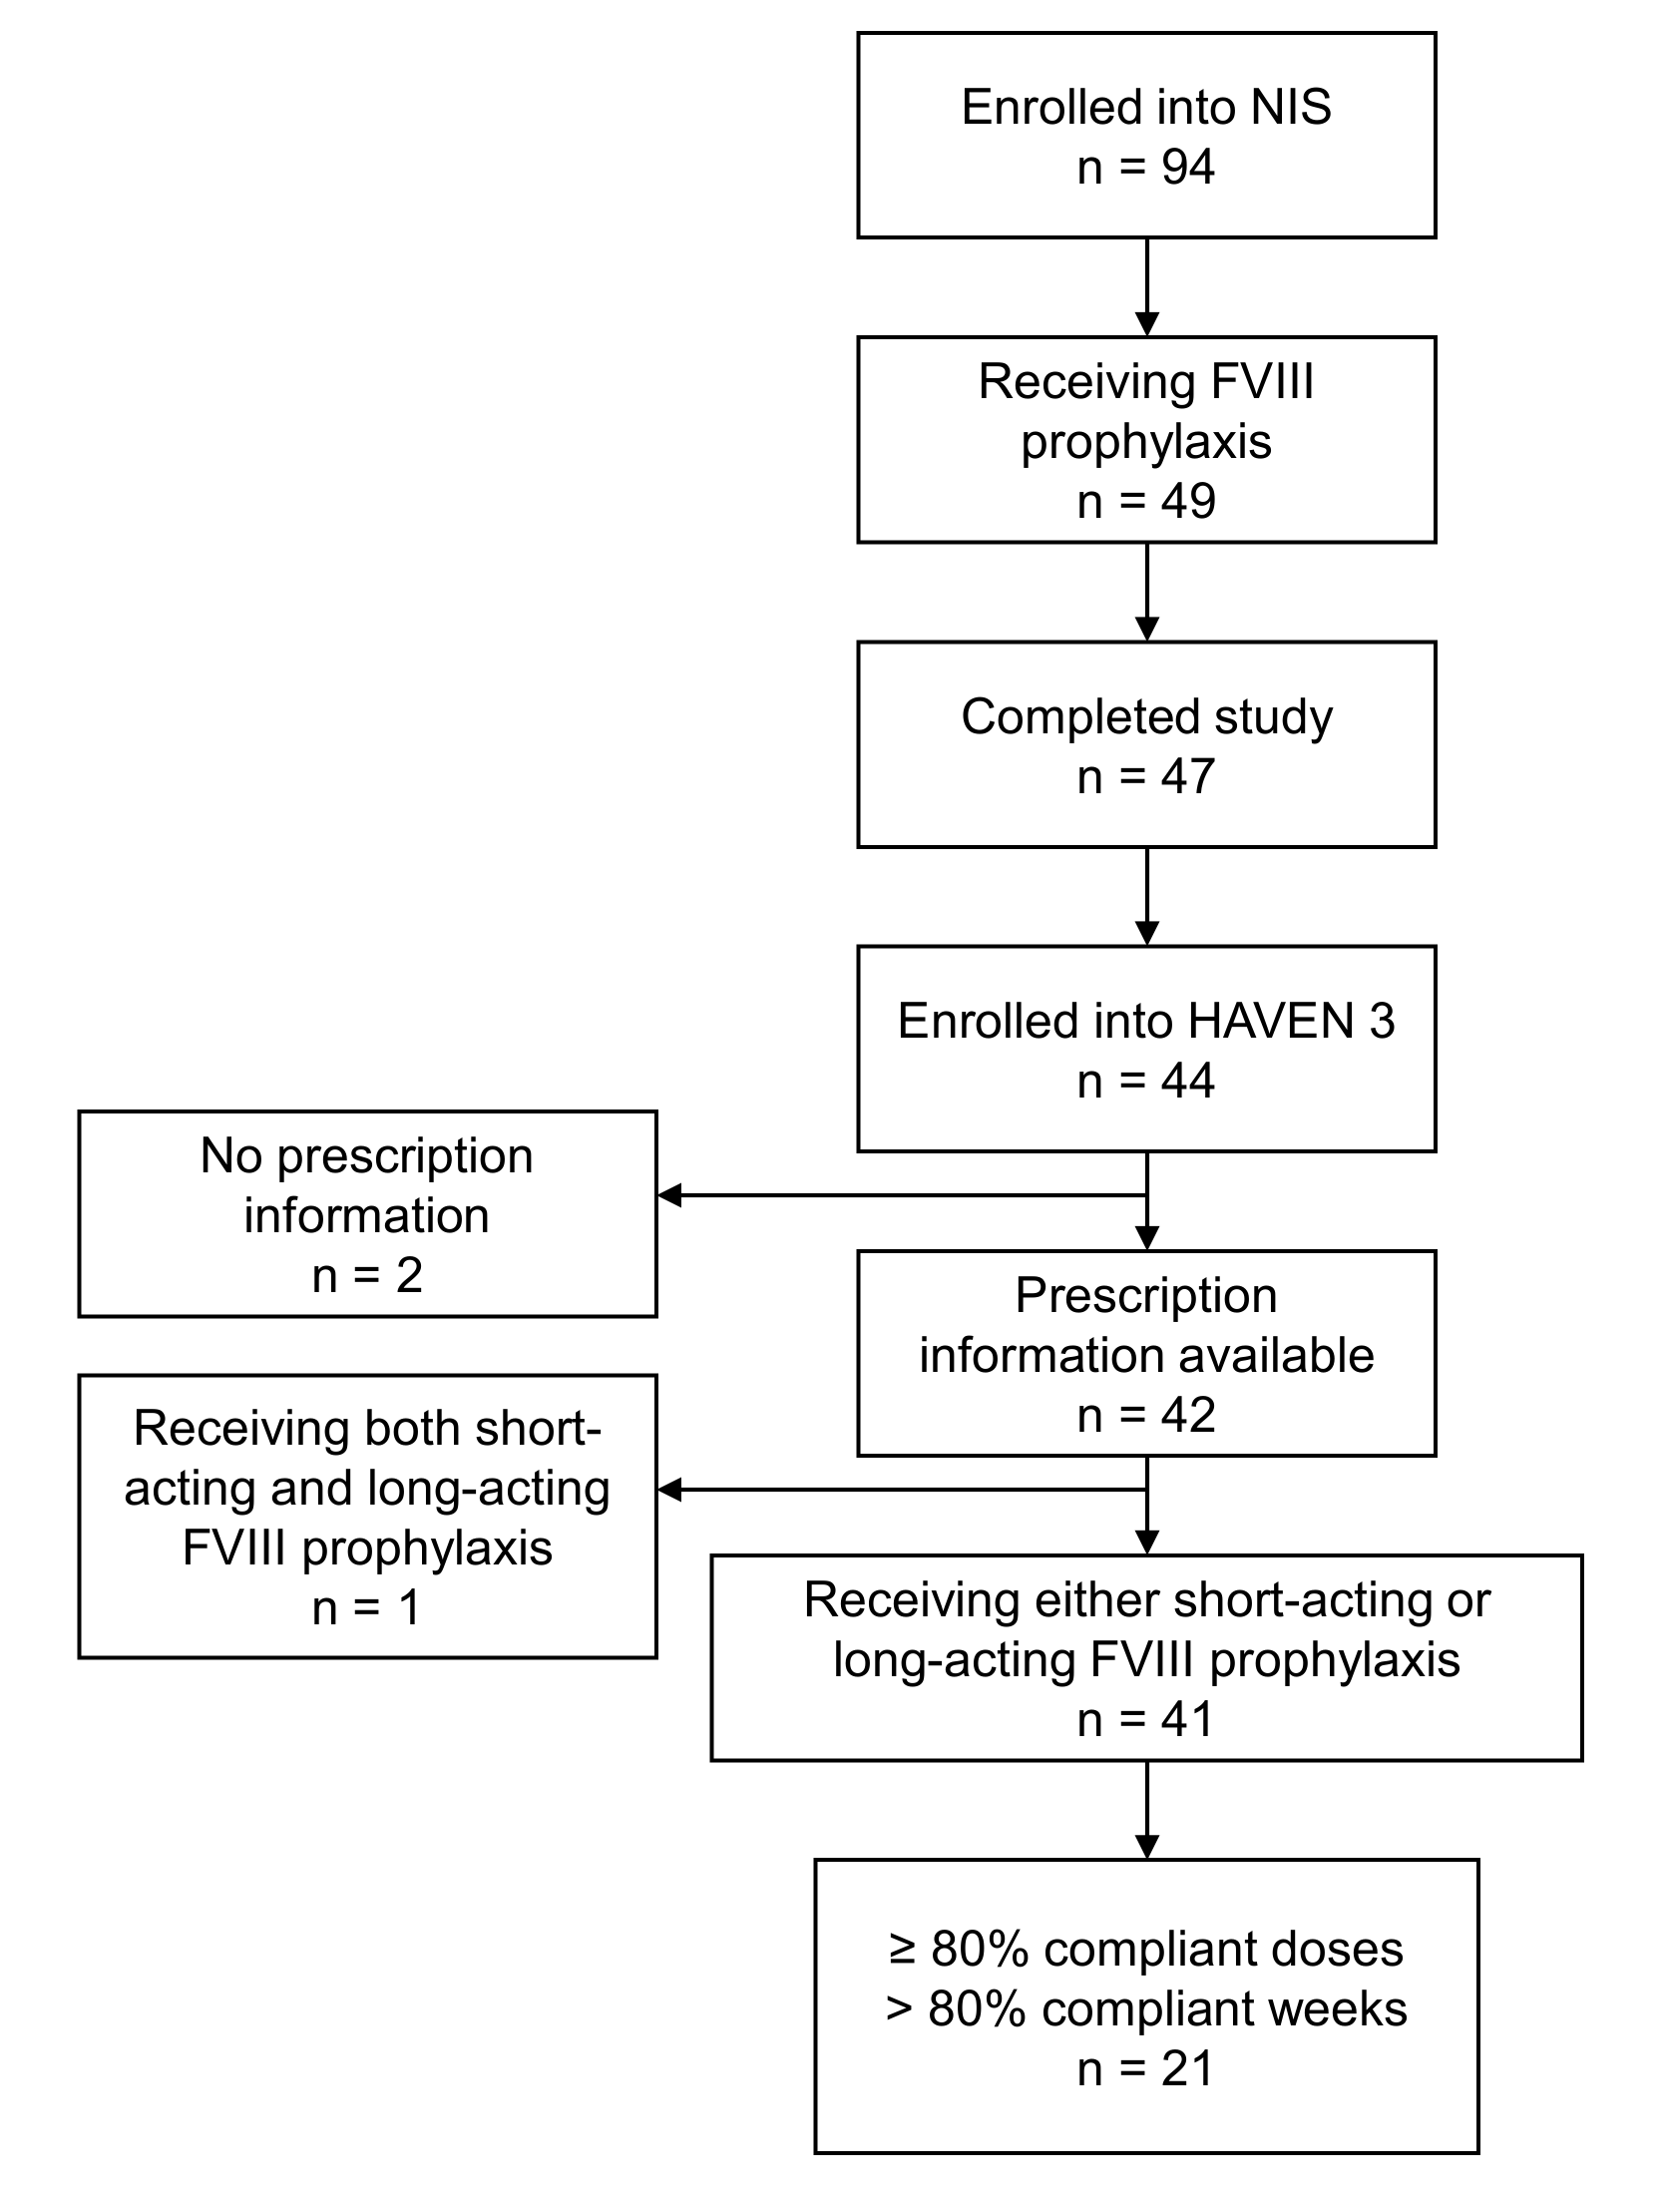


B: European label group


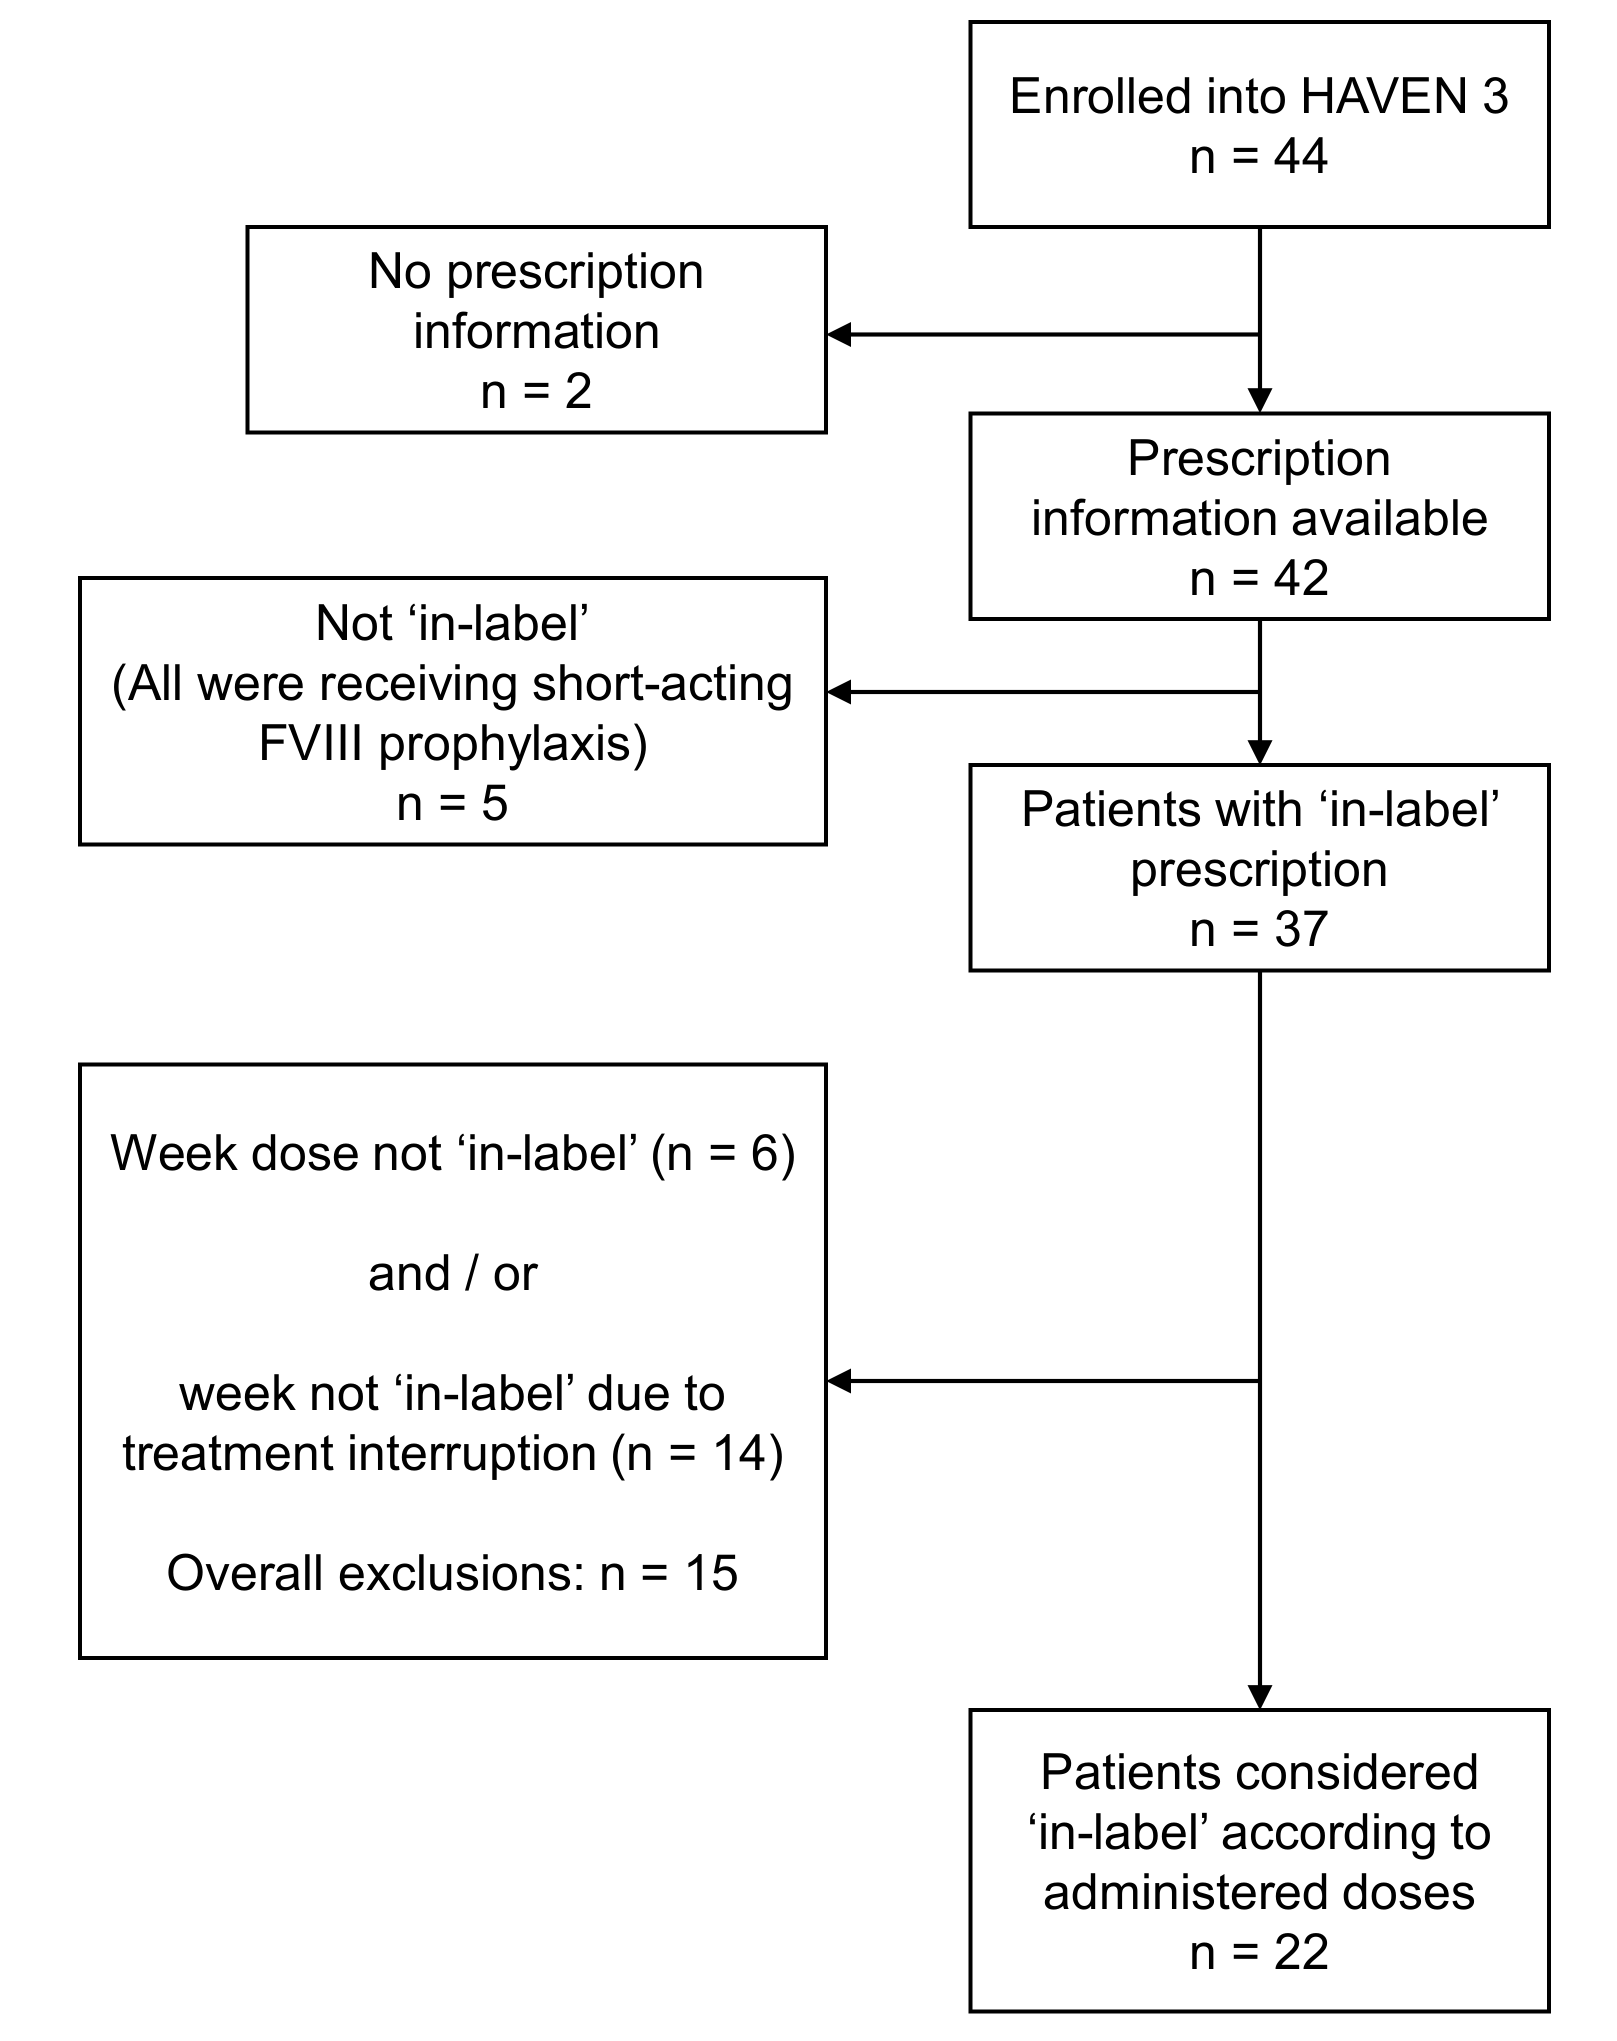


FVIII, factor VIII; NIS, non-interventional study; WFH, World Federation of Hemophilia.

# References

1. Boggio LN, Hong W, Wang M, et al. Bleeding protection using phenotype-guided bay 94-9027 prophylaxis: Protect VIII study subanalyses. Haemophilia 2015;21:65.

2. SmPC A. Advate Summary of Product Characteristics.

3. National Institute for Health and Care Excellence (NICE). Specification for manufacturer/sponsor submission of evidence, June 2012. Available from: <https://www.google.com/search?q=nice+Specification+for+manufacturer%2Fsponsor+submission+of+evidence&rlz=1C1GCEU_en-GBGB819GB819&oq=nice+Specification+for+manufacturer%2Fsponsor+submission+of+evidence&aqs=chrome..69i57j69i60j0.1166j0j4&sourceid=chrome&ie=UTF-8#> (Accessed April 2019).

4. National Institutes of Health. Study quality assessment tools for case series studies. Available from: <https://www.nhlbi.nih.gov/health-topics/study-quality-assessment-tools> (Accessed April 2019).

5. Chai-Adisaksopha C, Hillis C, Thabane L, et al. A systematic review of definitions and reporting of bleeding outcome measures in haemophilia. Haemophilia 2015;21(6):731–5.

6. Mahlangu J, Oldenburg J, Paz-Priel I, et al. Emicizumab prophylaxis in patients who have hemophilia A without inhibitors. N Engl J Med 2018;379(9):811–822.

7. Kavakli K, Yang R, Rusen L, et al. Prophylaxis vs. on-demand treatment with BAY 81-8973, a full-length plasma protein-free recombinant factor VIII product: results from a randomized trial (LEOPOLD II). J Thromb Haemost 2015;13(3):360–369.

8. Manco-Johnson MJ, Lundin B, Funk S, et al. Effect of late prophylaxis in hemophilia on joint status: a randomized trial. J Thromb Haemost 2017;15(11):2115–2124.

9. Valentino LA, Mamonov V, Hellmann A, et al. A randomized comparison of two prophylaxis regimens and a paired comparison of on-demand and prophylaxis treatments in hemophilia A management. J Thromb Haemost 2012;10(3):359–367.

10. Blanchette V. Definitions in hemophilia - Project Group of the Factor XIII/IX Subcommittee of the International Society on Thrombosis and Haemostasis (ISTH). Haemophilia 2012;18(suppl 3):14.

11. Donadel-Claeyssens S, European Paediatric Network for Haemophilia M. Current co-ordinated activities of the PEDNET (European Paediatric Network for Haemophilia Management). Haemophilia 2006;12(2):124-7.

12. Kavakli K, Yang R, Rusen L, et al. Prophylaxis vs. on-demand treatment with BAY 81-8973, a full-length plasma protein-free recombinant factor VIII product: Results from a randomized trial (LEOPOLD II). Journal of Thrombosis and Haemostasis 2015;13(3):360-369.

13. European Medicines Agency. Summary of product characteristics: Advate 250 IU powder and solvent for solution for injection. Available from: <https://www.ema.europa.eu/en/documents/product-information/advate-epar-product-information_en.pdf> (Accessed March 2019).

14. European Medicines Agency. Summary of product characteristics: Kovaltry. Available from: <https://www.ema.europa.eu/en/documents/product-information/kovaltry-epar-product-information_en.pdf> (Accessed March 2019).

15. European Medicines Agency. Summary of product characteristics: Kogenate. Available from: <https://www.ema.europa.eu/en/documents/product-information/kogenate-bayer-epar-product-information_en.pdf> (Accessed March 2019).

16. European Medicines Agency. Summary of product characteristics: NovoEight. Available from: <https://www.ema.europa.eu/en/documents/product-information/novoeight-epar-product-information_en.pdf> (Accessed April 2019).

17. European Medicines Agency. Summary of product characteristics: ReFacto AF. Available from: <https://www.ema.europa.eu/en/documents/product-information/refacto-af-epar-product-information_en.pdf> (Accessed April 2019).

18. European Medicines Agency. Summary of product characteristics: Elocta. Available from: <https://www.ema.europa.eu/en/documents/product-information/elocta-epar-product-information_en.pdf> (Accessed March 2019).

19. Valentino LA, Mamonov V, Hellmann A, et al. A randomized comparison of two prophylaxis regimens and a paired comparison of on-demand and prophylaxis treatments in hemophilia A management. Journal of Thrombosis and Haemostasis 2012;10(3):359-367.

20. Saxena K, Lalezari S, Oldenburg J, et al. Efficacy and safety of BAY 81-8973, a full-length recombinant factor VIII: results from the LEOPOLD I trial. Haemophilia 2016;22(5):706–712.

21. Mancuso ME, Beckmann H, Enriquez MM. BAY 81-8973 prophylaxis efficacy in patients with severe hemophilia A: Analyses of annualized bleeding rate outcomes in the LEOPOLD I trial. Journal of Thrombosis and Haemostasis 2015;13:177.

22. Windyga J, Maas Enriquez M, Beckmann H, et al. Prophylaxis with bay 81-8973, a full-length plasma-protein-free recombinant factor viii product: Efficacy results in leopold I by baseline patient characteristics. Haemophilia 2015;21:64–65.

23. Mahlangu JN, Kavakli K, Hvitfeldt Poulsen L, et al. 2015. Prophylactic efficacy of twice-weekly vs. 3-times-weekly bay 81-8973 in severe hemophilia A: results of the Leopold I and II clinical trials [abstract]. Journal of Thrombosis and Haemostasis : JTH. p 858, Abstract no: PO293–WED.

24. Fujii T, Hanabusa H, Shima M, et al. Analysis of the Japanese subgroup in LEOPOLD II: a phase 2/3 study of BAY 81-8973, a new recombinant factor VIII product. International Journal of Hematology 2016:1–7.

25. Ljung R, Kenet G, Mancuso ME, et al. BAY 81-8973 safety and efficacy for prophylaxis and treatment of bleeds in previously treated children with severe haemophilia A: Results of the LEOPOLD Kids Trial. Haemophilia 2016;22(3):354–360.

26. Church N, Pocoski J, Ayyagari R, et al. Factors affecting BAY 81-8973 prophylaxis frequency in pediatric patients with severe hemophilia A: an analysis of LEOPOLD KIDS data. Haemophilia 2016;22(Suppl 4):47–48.

27. Mahlangu J, Powell JS, Ragni MV, et al. Phase 3 study of recombinant factor VIII Fc fusion protein in severe hemophilia A. Blood 2014;123(3):317–325.

28. Shapiro AD, Ragni MV, Kulkarni R, et al. Recombinant factor VIII Fc fusion protein: extended-interval dosing maintains low bleeding rates and correlates with von Willebrand factor levels. Journal of thrombosis and haemostasis : JTH 2014;12(11):1788–800.

29. Wyrwich KW, Krishnan S, Auguste P, et al. Changes in health-related quality of life with treatment of longer-acting clotting factors: results in the A-LONG and B-LONG clinical studies. Haemophilia 2016;22(6):866–872.

30. Klamroth R, Quon DV, Kulkarni R, et al. Subject-reported changes in physical activity during the a-long study of recombinant factor VIII FC fusion protein (rFVIIIFc) for severe haemophilia A. Haemophilia 2015;21:34.

31. Quon DV, Klamroth R, Kulkarni R, et al. 2015. Low Bleeding Rates with Increase or Maintenance of Physical Activity in Patients Treated with Recombinant Factor VIII Fc Fusion Protein (rFVIIIFc) in the A-LONG and Kids A-LONG Studies. ASH, 57th Annual Meeting & Exposition. Orlando, FL, USA.

32. Klamroth R, Quon DV, Kulkarni R, et al. Low Bleeding Rates with Increase or Maintenance of Physical Activity in Patients Treated with Recombinant Factor VIII FC Fusion Protein (rFVIIIFc) in the A-LONG and Kids A-LONG Studies. Haemophilia 2016;22(Suppl 2):20.

33. Young G, Mahlangu J, Kulkarni R, et al. Recombinant factor VIII Fc fusion protein for the prevention and treatment of bleeding in children with severe hemophilia A. Journal of Thrombosis and Haemostasis 2015;13(6):967–977.

34. Young G, Mahlangu J, Kulkarni R, et al. Safety, efficacy, and pharmacokinetics of recombinant factor viii fc fusion protein (rFVIIIFc) in previously treated paediatric subjects with severe haemophilia a (kids a-long). Haemophilia 2015;21:32.

35. Chalmers E, Young G, Mahlangu J, et al. Treatment of bleeding with recombinant factor VIII FC fusion protein in previously-treated pediatric subjects with hemophilia A in the phase 3 kids a-long study. Journal of Thrombosis and Haemostasis 2015;13(Suppl 2):348.

36. Nolan B, Young G, Rangarajan S, et al. Analysis of bleeding rates in pediatric subjects with target joints and severe hemophilia A receiving prophylaxis with recombinant factor viii fc fusion protein (RFVIIIFC) in kids a-long. Journal of Thrombosis and Haemostasis 2015;13(Suppl 2):347.

37. Young G, Kulkarni R, Ragni M, et al. Low annualized bleeding rates (ABRS) with recombinant factor VIII FC fusion protein (RFVIIIFC) across demographic subgroups of previously treated pediatric subjects with severe hemophilia A. Journal of Thrombosis and Haemostasis 2015;13(Suppl 2):844.

38. Nolan B, Mahlangu J, Perry D, et al. Long-term safety and efficacy of recombinant factor VIII Fc fusion protein (rFVIIIFc) in subjects with haemophilia A. Haemophilia 2016;22(1):72–80.

39. Jackson S, Perry D, Quon D, et al. Safety and efficacy of recombinant factor VIII FC fusion protein (RFVIIIFC) for the prevention and treatment of bleeding in previously-treated adult and adolescent subjects with hemophilia A: Interim analysis of the aspire study. Journal of Thrombosis and Haemostasis 2015;13:346–347.

40. Kerlin BA, Kulkarni R, Nolan B, et al. Long-term efficacy of rfVIIIFc prophylaxis in pediatric, adolescent, and adult subjects with target joints and severe hemophilia A. Blood 2015;126(23):3520.

41. Young G, Liesner R, Pasi J, et al. 2016. Longitudinal Analysis of Long-Term Safety and Efficacy of Recombinant Factor VIII Fc Fusion Protein (rFVIIIFc) in Previously Treated Children with Severe Hemophilia a. ASH, 58th Annual Meeting & Exposition. San Diego, CA, USA.

42. Wang M, Pasi J, Pabinger I, et al. 2016. Long-Term Efficacy and Quality of Life with Recombinant Factor VIII Fc Fusion Protein (rFVIIIFc) Prophylaxis in Pediatric, Adolescent, and Adult Subjects with Target Joints and Severe Hemophilia a. ASH, 58th Annual Meeting & Exposition. San Diego, CA, USA.

43. Quon DV, Young G, Ragni MV, et al. Long-term efficacy of recombinant factor VIII Fc fusion protein (rFVIIIFc) in adults/adolescents with severe hemophilia A: United States subgroup analysis of A-LONG and ASPIRE. Haemophilia 2016;22(Suppl 4):50.

44. Nolan B, Young G, Mahlangu J, et al. Second Interim Analysis of the Aspire Study Evaluating Long-Term Safety and Efficacy of Recombinant Factor VIII FC Fusion Protein (rFVIIIFc) in Children with Severe Haemophilia A. Haemophilia 2016;22(Suppl 2):65–66.

45. Nolan B, Liesner R, Young G, et al. Dosing regimens before and following long-term treatment with recombinant factor VIII Fc fusion protein (rFVIIIFc) in children with severe hemophilia A. Haemophilia 2016;22(Suppl 4):48–49.

46. Konkle B, Pasi J, Perry DJ, et al. 2016. Longitudinal Analysis of Long-Term Safety and Efficacy of Recombinant Factor VIII Fc Fusion Protein (rFVIIIFc) in Adults/Adolescents with Severe Hemophilia a ASH, 58th Annual Meeting & Exposition. San Diego, CA, USA.

47. Pasi KJ, Perry DJ, Mahlangu J, et al. Long-Term Safety and Efficacy of Recombinant Factor VIII FC Fusion Protein (rFVIIIFc) in Adults and Adolescents with Severe Haemophilia A: An Updated Interim Analysis of the Aspire Study. Haemophilia 2016;22(Suppl 2):64.

48. Oldenburg J, Kulkarni R, Srivastava A, et al. Longitudinal modified hemophilia joint health scores (mHJHS) outcomes with recombinant factor VIII Fc fusion protein (rFVIIIFc) prophylaxis in subjects with severe hemophilia A. Haemophilia 2016;22(Suppl 4):40.

49. Oldenburg J, Srivastava A, Mahlangu J, et al. Modified Haemophilia Joint Health Scores (MHJHS) Outcomes with Recombinant Factor VIII FC Fusion Protein (rFVIIIFc) Prophylaxis in Subjects with Severe Haemophilia A. Haemophilia 2016;22(Suppl 2):68.

50. Kerlin BA, Kulkarni R, Nolan B, et al. 2015. Long-Term Efficacy of rFVIIIFc Prophylaxis in Pediatric, Adolescent, and Adult Subjects with Target Joints and Severe Hemophilia A. ASH, 57th Annual Meeting & Exposition. Orlando, FL, USA.

51. Shapiro AD, Srivastava A, Ragni MV, et al. Longitudinal analysis of annualized bleeding rates among adults/adolescents receiving weekly prophylaxis with rFVIIIFc in A-LONG and ASPIRE. Haemophilia 2016;22(Suppl 4):108.

52. Pasi J, Perry DJ, Mahlangu J, et al. 2015. Long-Term Safety and Efficacy of rFVIIIFc in Adults and Adolescents with Severe Hemophilia A: A Longitudinal Analysis of A-LONG and ASPIRE ASH, 57th Annual Meeting & Exposition. Orlando, FL, USA.

53. Nolan B, Young G, Mahlangu J, et al. Interim Analysis Of The ASPIRE Study Evaluating Long-term Safety And Efficacy Of Recombinant Factor VIII FC (RFVIIIFC) In Children With Severe Haemophilia A. Haemophilia 2015;21(Suppl 2):58–59.

54. Lentz SR, Misgav M, Ozelo M, et al. Results from a large multinational clinical trial (guardian™1) using prophylactic treatment with turoctocog alfa in adolescent and adult patients with severe haemophilia A: Safety and efficacy. Haemophilia 2013;19(5):691–697.

55. Ozelo M, Chowdary P, Regnault A, et al. Impact of severe haemophilia A on patients' health status: Results from the guardian™ 1 clinical trial of turoctocog alfa (NovoEight®). Haemophilia 2015;21(4):451–457.

56. Santagostino E, Lentz SR, Busk AK, et al. Assessment of the impact of treatment on quality of life of patients with haemophilia A at different ages: Insights from two clinical trials on turoctocog alfa. Haemophilia 2014;20(4):527–534.

57. Lentz SR, Cerqueira M, Janic D, et al. Interim results from a large multinational extension trial (guardian((TM)) 2) using turoctocog alfa for prophylaxis and treatment of bleeding in patients with severe haemophilia A. Haemophilia : the official journal of the World Federation of Hemophilia 2016;22(5):445–9.

58. Ozelo M, Misgav M, Abdul Karim F, et al. Long-term patterns of safety and efficacy of bleeding prophylaxis with turoctocog alfa (NovoEight(®) ) in previously treated patients with severe haemophilia A: interim results of the guardian((TM)) 2 extension trial. Haemophilia : the official journal of the World Federation of Hemophilia 2015;21(5):436–9.

59. Lentz S, Kempton CL, Janic D, et al. Interim results from a large multinational extension trial (Guardian TM2) using turoctocog alfa for prophylaxis and treatment of bleeding in patients with severe haemophilia A. Journal of Thrombosis and Haemostasis 2015;13:842.

60. Kolla R, Lejniece S, Martin-Salces M, et al. Safety of turoctocog alfa for prophylaxis and treatment of bleeding episodes in patients with severe haemophilia a: Results from the guardian™2 trial. Indian Journal of Hematology and Blood Transfusion 2016;32:S375-S376.

61. Recht M, Lentz SR, Kempton CL, et al. Safety of turoctocog alfa for prophylaxis and treatment of bleeding episodes in patients with severe hemophilia A: Results from the Guardian™2 trial. American Journal of Hematology 2016;91(9):E421.

62. Ozelo M, Misgav M, Abdulkarim F, et al. Stabilization of turoctocog alfa dose administered in a preventive regimen: 3-year interim results of the guardianTM-2 extension trial. Haemophilia 2014;20:85.

63. Janic D, Matysina I, Misgav M, et al. 2016. Safety and Efficacy of Turoctocog Alfa in Prevention and on-Demand Treatment of Bleeding Episodes in Patients with Hemophilia A. ASH, 58th Annual Meeting & Exposition. San Diego, CA, USA.

64. Santagostino E, Janic D, Karim FA, et al. Efficacy and safety of turoctocog alfa for prophylaxis and treatment of bleeding episodes in patients with severe hemophilia A: results from the guardianTM2 trial. Haemophilia 2016;22(Suppl 4):48.

65. Laguna P, Savic A, Matytsina I, et al. Prior Treatment Regimen Influences Annualised Bleeding Rate During Long-Term Prophylaxis With Turoctocog Alfa: Experiences From Multinational Trials. Haemophilia 2015;21(Suppl 2):49.

66. Kulkarni R, Karim FA, Glamocanin S, et al. Results from a large multinational clinical trial (guardian™3) using prophylactic treatment with turoctocog alfa in paediatric patients with severe haemophilia A: Safety, efficacy and pharmacokinetics. Haemophilia 2013;19(5):698–705.

67. Glamocanin S, Trajkova-Antevska Z, Coneska B. Improvement of the quality of health care for children with severe haemophilia a using prophylaxis and treatment of bleeding episodes with recombinant factor VIII. Journal of Thrombosis and Haemostasis 2015;13:856.

68. Giangrande P, Andreeva T, Chowdary P, et al. Clinical evaluation of glycoPEGylated recombinant FVIII: Efficacy and safety in severe haemophilia A. Thrombosis and haemostasis 2016.

69. Meunier S, Alamelu J, Ehrenforth S, et al. First report of safety and efficacy of a glycoPEGylated FVIII (N8-GP) in previously treated pediatric patients with severe hemophilia A—results from the international phase 3 pathfinderTM5 trial. Haemophilia 2016;22(Suppl 4):49–50.

70. Manco-Johnson MJ, Kempton CL, Reding MT, et al. Randomized, controlled, parallel-group trial of routine prophylaxis vs. on-demand treatment with sucrose-formulated recombinant factor VIII in adults with severe hemophilia A (SPINART). Journal of Thrombosis and Haemostasis 2013;11(6):1119–1127.

71. Funk S, Lundin B, Hong W. Spinart 3-year analyses: Patient-and joint-level changes in colorado adult joint assessment scale and magnetic resonance imaging scores with Bayer's sucrose-formulated recombinant factor VIII in adolescents and adults. Journal of Thrombosis and Haemostasis 2015;13:244.

72. Lundin B, Hong W, Raunig D, et al. 3-year analyses from spinart: Patient-and joint-level changes in magnetic resonance imaging scores with bayer's sucrose-formulated recombinant factor VIII (RFVIIIFS) in adolescents and adults previously treated on demand. Haemophilia 2015;21:40–41.

73. Pocoski J, Humphries TJ, Hong W. Spinart 3-year data: Patient-reported benefits of adult prophylaxis vs on-demand treatment with bayer's sucrose-formulated recombinant factor viii. Haemophilia 2015;21:51–52.

74. Reding MT, Kempton CL, Funk S, et al. Spinart trial 3-year results with bayer's sucroseformulated recombinant factor VIII: Relationship between bleeding frequency and joint health in adults with severe hemophilia A using prophylaxis. Journal of Thrombosis and Haemostasis 2015;13:132.

75. Kreuz W, Gill JC, Rothschild C, et al. Full-length sucrose-formulated recombinant factor VIII for treatment of previously untreated or minimally treated young children with severe haemophilia A: results of an international clinical investigation. Thrombosis and haemostasis 2005;93(3):457–67.

76. Shi J, Zhao Y, Wu J, et al. Safety and efficacy of a sucrose-formulated recombinant factor VIII product for the treatment of previously treated patients with haemophilia A in China. Haemophilia 2007;13(4):351–356.

77. Vdouin VV, Andreeva TA, Chernoua TA, et al. Prophylaxis with once, twice or three-times weekly dosing of rFVIII-FS Prevents joint bleeds in a previously treated pediatric population with moderate/severe hemophilia A. Journal of Coagulation Disorders 2011;3(1):1–8.

78. Collins P, Faradji A, Morfini M, et al. Efficacy and safety of secondary prophylactic vs. on-demand sucrose-formulated recombinant factor VIII treatment in adults with severe hemophilia A: Results from a 13-month crossover study. Journal of Thrombosis and Haemostasis 2010;8(1):83–89.

79. Lalezari S, Martinowitz U, Windyga J, et al. Correlation between endogenous VWF: Ag and PK parameters and bleeding frequency in severe haemophilia A subjects during three-times-weekly prophylaxis with rFVIII-FS. Haemophilia 2013;20(1):e15-e22.

80. Lalezari S, Coppola A, Lin J, et al. Patient characteristics that influence efficacy of prophylaxis with rFVIII-FS three times per week: A subgroup analysis of the LIPLONG study. Haemophilia 2014;20(3):354–361.

81. Yoshioka A, Shima M, Fukutake K, et al. Safety and efficacy of a new recombinant FVIII formulated with sucrose (fFVIII-FS) in patients with haemophilia A: A long-term, multicentre clinical study in Japan. Haemophilia 2001;7(3):242–249.

82. Abshire TC, Brackmann HH, Scharrer I, et al. Sucrose formulated recombinant human antihemophilic factor VIII is safe and efficacious for treatment of hemophilia A in home therapy. Results of a multicenter, international, clinical investigation. Thrombosis and Haemostasis 2000;83(6):811–816.

83. Giangrande PL, Group KBS. Safety and efficacy of KOGENATE Bayer in previously untreated patients (PUPs) and minimally treated patients (MTPs). Haemophilia : the official journal of the World Federation of Hemophilia 2002;8 Suppl 2:19–22.

84. Manco-Johnson MJ, Abshire TC, Shapiro AD, et al. Prophylaxis versus episodic treatment to prevent joint disease in boys with severe hemophilia. New England Journal of Medicine 2007;357(6):535–544.

85. Zhao Y, Xiao J, Yang R, et al. Bleeding events in Chinese children with severe hemophilia A receiving standard prophylaxis vs ondemand treatment with Bayer’s sucrose-formulated recombinant factor VIII. Journal of Thrombosis and Haemostasis 2015;13(Suppl 2):858.

86. Shirahata A, Fukutake K, Takamatsu J, et al. Pharmacokinetics, prophylactic effects, and safety of a new recombinant FVIII formulated with sucrose (BAY 14-2222) in Japanese patients with hemophilia A. International journal of hematology 2000;72(1):101–107.

87. Lusher J, Abildgaard C, Arkin S, et al. Human recombinant DNA-derived antihemophilic factor in the treatment of previously untreated patients with hemophilia A: Final report on a hallmark clinical investigation. Journal of Thrombosis and Haemostasis 2004;2(4):574–583.

88. Lusher JM, Arkin S, Abildgaard CF, et al. Recombinant factor VIII for the treatment of previously untreated patients with hemophilia A - Safety, efficacy, and development of inhibitors. New England Journal of Medicine 1993;328(7):453–459.

89. Gringeri A, Lundin B, von Mackensen S, et al. A randomized clinical trial of prophylaxis in children with hemophilia A (the ESPRIT Study). Journal of thrombosis and haemostasis : JTH 2011;9(4):700-10.

90. Arkin S, Rose E, Forster A, et al. Clinical efficacy of recombinant factor VIII. The rFactor VIII Clinical Trial Group. Seminars in hematology 1991;28(2 Suppl 1):47–51.

91. White Ii GC, Courter S, Bray GL, et al. A multicenter study of recombinant factor VIII (Recombinate®) in previously treated patients with hemophilia A. Thrombosis and Haemostasis 1997;77(4):660–667.

92. Karimi M, Eshghi P, Haghpanah S, et al. Efficacy and safety of prophylaxis in previously untreated patients with severe hemophilia a in Iran. Haematologica 2015;100:409.

93. Bray GL, Gomperts ED, Courter S, et al. A multicenter study of recombinant factor VIII (recombinate): Safety, efficacy, and inhibitor risk in previously untreated patients with hemophilia A. Blood 1994;83(9):2428–2435.

94. Auerswald G, Thompson AA, Recht M, et al. Experience of advate rahf-pfm in previously untreated patients and minimally treated patients with haemophilia a. Thrombosis and Haemostasis 2012;107(6):1072–1082.

95. Tarantino MD, Collins PW, Hay CRM, et al. Clinical evaluation of an advanced category antihaemophilic factor prepared using a plasma/albumin-free method: Pharmacokinetics, efficacy, and safety in previously treated patients with haemophilia A1. Haemophilia 2004;10(5):428–437.

96. Aygören-Pürsün E, Scharrer I. A multicenter pharmacosurveillance study for the evaluation of the efficacy and safety of recombinant factor VIII in the treatment of patients with hemophilia A. Thrombosis and Haemostasis 1997;78(5):1352–1356.

97. Lindvall K, Astermark J, Björkman S, et al. Daily dosing prophylaxis for haemophilia: A randomized crossover pilot study evaluating feasibility and efficacy. Haemophilia 2012;18(6):855–859.

98. Petrini P. What factor should influence the dosage and interval of prophylactic treatment in patients with severe haemophilia A and B? Haemophilia 2001;7(1):99–102.

99. Gulshan S, Chakrabarti P, Mandal PK, et al. A study of incidence of bleeding in children with severe hemophilia a on low dose secondary prophylaxis. Indian Journal of Hematology and Blood Transfusion 2016;32:S389.

100. Verma SP, Dutta TK, Mahadevan S, et al. A randomized study of very low-dose factor VIII prophylaxis in severe haemophilia - A success story from a resource limited country. Haemophilia 2016;22(3):342–348.

101. Crivianu-Gaita V, Rivard GE, Carcao M, et al. Pilot study of once-a-day prophylaxis for youth and young adults with severe haemophilia A. Haemophilia 2016;22(5):e401-e405.

102. Powell JS, Bush M, Harrison J, et al. Safety and efficacy of solvent/detergent-treated antihaemophilic factor with an added 80°C terminal dry heat treatment in patients with haemophilia A. Haemophilia 2000;6(3):140–149.

103. Lopez RP, Nemes L, Jimenez-Yuste V, et al. Prospective surveillance study of haemophilia A patients switching from moroctocog alfa or other factor VIII products to moroctocog alfa albumin-free cell culture (AF-CC) in usual care settings. Thrombosis and Haemostasis 2015;114(4):676–684.

104. Shiller E, Vdovin V, Petrov V, et al. Safety and efficacy of new moroctocog alfa drug (Octofactor) in prophylactic treatment in adolescent patients with severe and moderate hemophilia A. Blood 2015;126(23):4703.

105. Pfizer (Wyeth).Study Evaluating On-Demand Treatment Of Xyntha In Chinese Subjects: ClinicalTrials.gov, 2011. Available from: <https://ClinicalTrials.gov/show/NCT00868530> (Accessed).

106. Courter SG, Bedrosian CL. Clinical evaluation of B-domain deleted recombinant factor VIII in previously untreated patients. Seminars in Hematology 2001;38(2 SUPPL. 4):52–59.

107. Courter SG, Bedrosian CL. Clinical evaluation of B-domain deleted recombinant factor VIII in previously treated patients. Seminars in Hematology 2001;38(2 SUPPL. 4):44–51.

108. Klamroth R, Lissitchkov T, Rusen L, et al. Personalized prophylaxis with human-cl recombinant FVIII in ha patients. Blood 2015;126(23):547.

109. Klamroth R, Lissitchkov T, Rusen L, et al. Personalizedprophylaxis with Human-CL RHFVIII in hemophilia A patients. Journal of Thrombosis and Haemostasis 2015;13:850–851.

110. Klamroth R, Lissitchkov T, Rusen L, et al. Study on personalized prophylaxis with human-CL rhFVIII in adult patients with severe haemophilia a-interim data on 30 patients. Haemophilia 2015;21:38–39.

111. Klukowska A, Szczepanski T, Vdovin V, et al. Novel, human cell line-derived recombinant factor VIII (Human-cl rhFVIII, Nuwiq(®) ) in children with severe haemophilia A: efficacy, safety and pharmacokinetics. Haemophilia : the official journal of the World Federation of Hemophilia 2015.

112. Klukowska A, Vdovin V, Szczepanski T, et al. Long-term immunogenicity, safety and efficacy of human-cl rhFVIII in previously treated children with severe haemophilia A. Haemophilia 2016;22(Suppl 4):52.

113. Klukowska A, Vdovin V, Szczepanski T, et al. Long-Term Immunogenicity, Safety and Efficacy of Human-cl rhFVIII in Previously Treated Children with Severe Haemophilia A. Haemophilia 2016;22(Suppl 2):96.

114. Lissitchkov T, Hampton K, von Depka M, et al. Novel, human cell line-derived recombinant factor VIII (human-cl rhFVIII; Nuwiq®) in adults with severe haemophilia A: Efficacy and safety. Haemophilia 2016;22(2):225–231.

115. Tiede A, Oldenburg J, Lissitchkov T, et al. Prophylaxis vs. on-demand treatment with Nuwiq® (Human-cl rhFVIII) in adults with severe haemophilia A. Haemophilia 2016;22(3):374–380.

116. Nemes L, Lissitchkov T, Klukowska A, et al. Evaluation of pharmacokinetics, efficacy and safety of Immunate® solvent detergent in previously treated patients with severe haemophilia A. Haemophilia 2007;13(1):9–11.

117. Nemes L, Lissitchkov T, Dobaczewski G, et al. Pharmacokinetics, efficacy and safety of IMMUNATE solvent/detergent (IMMUNATE S/D) in previously treated patients with severe hemophilia A: results of a prospective, multicenter, open-label phase III study. Acta haematologica 2008;119(2):89–97.

118. Pompa MT, Iosava G, Khayat C, et al. 2015. A phase III, open-label, multicentre study to evaluate efficacy and safety of a plasma-derived von Willebrand factor/ factor VIII concentrate in pediatric subjects with hemophilia A (Swiftly-HA study) [abstract]. Journal of Thrombosis and Haemostasis : JTH. p 841, Abstract no: PO249–WED.

119. Skotnicki A, Lissitchkov TJ, Mamonov V, et al. Efficacy, safety and pharmacokinetic profiles of a plasma-derived VWF/FVIII concentrate (VONCENTO®) in subjects with haemophilia A (SWIFT-HA study). Thrombosis Research 2016;137:119–125.

120. Peyvandi F, Mannucci PM, Garagiola I, et al. A randomized trial of factor VIII and neutralizing antibodies in hemophilia A. New England Journal of Medicine 2016;374(21):2054–2064.

121. Dmoszynska A, Kuliczkowski K, Hellmann A, et al. Clinical assessment of Optivate®, a high-purity concentrate of factor VIII with von Willebrand factor, in the management of patients with haemophilia A. Haemophilia 2011;17(3):456–462.

122. Matysiak M, Bobrowska H, Balwierz W, et al. Clinical experience with Optivate®, high-purity factor VIII (FVIII) product with von Willebrand factor (VWF) in young children with haemophilia A. Haemophilia : the official journal of the World Federation of Hemophilia 2011;17(5):737–42.

123. Konkle BA, Stasyshyn O, Chowdary P, et al. Pegylated, full-length, recombinant factor VIII for prophylactic and on-demand treatment of severe hemophilia A. Blood 2015;126(9):1078–1085.

124. Mullins ES, Stasyshyn O, Alvarez-Roman MT, et al. Extended half-life pegylated, full-length recombinant factor VIII for prophylaxis in children with severe haemophilia A. Haemophilia 2016.

125. Hyun SY, Park SY, Lee SY, et al. Efficacy, safety, and pharmacokinetics of beroctocog alfa in patients previously treated for hemophilia A. Yonsei Medical Journal 2015;56(4):935–943.

126. Ledger KS, Bensen-Kennedy D, Backman N, et al. Clinical decision making is effective in reducing bleeding rates without the need to monitor FVIII trough levels tn patients with severe hemophilia a receiving prophylaxis with rVIII-SingleChain. Journal of Thrombosis and Haemostasis 2016;14:49.

127. Mahlangu J, Kuliczkowski K, Karim FA, et al. Efficacy and safety of rVIII-Singlechain: Results of a phase 1/3 multicenter clinical trial in severe hemophilia A. Blood 2016;128(5):630–637.

128. Philipp CS. Viral safety of a pasteurized, monoclonal antibody-purified factor VIII concentrate in previously untreated haemophilia A patients. Haemophilia 2001;7(2):146–153.

129. Wolf DM, Rokicka-Milewska R, Lopaciuk S, et al. Clinical efficacy, safety and pharmacokinetic properties of the factor VIII concentrate Haemoctin® SDH in previously treated patients with severe haemophilia A. Haemophilia 2004;10(5):438–448.

130. Vossebeld PJM, Tissing MH, van den Berg HM, et al. In vivo recovery and safety of human factor VIII product AAFACT® in patients with haemophilia A. Haemophilia 2003;9(2):157–163.

131. Lusher JM, Salzman PM. Viral safety and inhibitor development associated with factor VIIIC ultra-purified from plasma in hemophiliacs previously unexposed to factor VIIIC concentrates. The Monoclate Study Group. Seminars in hematology 1990;27(2 Suppl 2):1–7.

132. Santagostino E, Saxena K, Kenet G, et al. PROTECT VIII Kids trial results: BAY 94-9027 safety and efficacy in previously treated children with severe hemophilia A. Haemophilia 2016;22(Suppl 4):41.

133. Bayer AG.A multi-center, phase III, non-controlled, open-label trial to evaluate the pharmacokinetics, safety, and efficacy of BAY 94-9027 for prophylaxis and treatment of bleeding in previously treated chi: ClinicalTrials.gov, 2013. Available from: <https://www.clinicaltrialsregister.eu/ctr-search/search?query=eudract_number:2012-004434-42> (Accessed 2012-004434-42).

134. Leissinger C, Becton D, Cornell Jr C, et al. High-dose DDAVP intranasal spray (Stimate®) for the prevention and treatment of bleeding in patients with mild haemophilia A, mild or moderate type 1 von Willebrand disease and symptomatic carriers of haemophilia A. Haemophilia 2001;7(3):258-266.

135. Eshghi P, Abolghasemi H, Malek F, et al. A prospective crossover triple-blind controlled trial on the safety and efficacy of Iranian recombinant FVIII (Safacto®) versus plasma derived FVIII; a pilot study. Iranian Journal of Blood and Cancer 2015;7(4):171-174.

136. Smith MP, Giangrande P, Pollman H, et al. A postmarketing surveillance study of the safety and efficacy of ReFacto® (St Louis-derived active substance) in patients with haemophilia A. Haemophilia 2005;11(5):444-451.

137. Nemes L, Pollmann H, Becker T. Interim data on long-term efficacy, safety and tolerability of a plasma-derived factor VIII concentrate in 109 patients with severe haemophilia A. Haemophilia 2012;18(4):496-502.

138. Hay CR, Lee CA, Savidge G. A post-marketing safety and efficacy assessment of a monoclonal antibody purified high-purity factor VIII concentrate. Haemophilia : the official journal of the World Federation of Hemophilia 1996;2(1):32-6.

139. Yoshioka A, Fukutake K, Takamatsu J, et al. Clinical Evaluation of a Recombinant Factor VIII Preparation (Kogenate) in Previously Untreated Patients with Hemophilia A. International Journal of Hematology 2003;78(5):467-474.

140. Calvez T, Chambost H, Claeyssens-Donadel S, et al. Recombinant factor VIII products and inhibitor development in previously untreated boys with severe hemophilia A. Blood 2014;124(23):3398-3408.

141. Jimenez-Yuste V, Shima M, Fukutake K, et al. Emicizumab Subcutaneous Dosing every 4 weeks for the management of hemophilia A: preliminary data from the pharmacokinetic run-in cohort of a multicenter, open-label, phase 3 study (HAVEN 4). . Blood, 2017, 130.

142. Pipe S J-YV, Shapiro A, et al. . Emicizumab subcutaneous dosing every 4 weeks is safe and efficacious in the control of bleeding in persons with hemophilia A (PwHA) with and without inhibitors: Results from HAVEN 4 study [abstract] World Federation of Hemophilia 2018, World Congress 2018, 20-24 May, 2018.

143. Ozelo M, Wu R, Belhani M, et al. Guardian(TM) 4: safety and efficacy of turoctocog alfa in prevention and treatment of bleeds in previously untreated patients with hemophilia A. . Haemophilia. 2018;, 2018, 24:101-102.

144. Zhao Y, Xiao J, Yang R, et al. Efficacy of standard prophylaxis versus on-demand treatment with bayer's sucrose-formulated recombinant FVIII (rFVIII-FS) in Chinese children with severe hemophilia A. Pediatr Hematol Oncol 2017;34(3):138-148.

145. Ragni MV, Yabes JG, Fogarty PF, et al. Pilot randomized, non-inferiority, cross-over trial of once-weekly vs. three times-weekly recombinant factor VIII prophylaxis in adults with severe haemophilia A. Haemophilia 2017;23(1):e43-e46.

146. Karimi M, Eshghi P, Safarpour MM, et al. Modified Primary Prophylaxis in Previously Untreated Patients With Severe Hemophilia A in Iran. J Pediatr Hematol Oncol 2018;40(3):188-191.

147. Chozie N, Primacakti F, Tulaar A, et al. Low-dose prophylaxis versus on-demand treatment in Indonesian children with severe hemophilia A: An interim report. . Haemophilia, 2018, 24

148. Lissitchkov T, Rusen L, Georgiev P, et al. PK-guided personalized prophylaxis with Nuwiq((R)) (human-cl rhFVIII) in adults with severe haemophilia A. Haemophilia 2017;23(5):697-704.

149. Liesner RJ, Abashidze M, Aleinikova O, et al. Immunogenicity, efficacy and safety of Nuwiq((R)) (human-cl rhFVIII) in previously untreated patients with severe haemophilia A-Interim results from the NuProtect Study. Haemophilia 2018;24(2):211-220.

150. Klukowska A, Komrska V, Vdovin V, et al. Low incidence of factor VIII inhibitors in previously untreated patients with severe haemophilia A treated with octanate((R)) : Final report from a prospective study. Haemophilia 2018;24(2):221-228.

151. Rusen L, Kavakli K, Korth-Bradley J, et al. Clinical experience with moroctocog alfa (AF-CC) in younger paediatric patients with severe haemophilia A: Two open-label studies. Haemophilia 2018.

152. Stasyshyn O, Djambas Khayat C, Iosava G, et al. Safety, efficacy and pharmacokinetics of rVIII-SingleChain in children with severe hemophilia A: results of a multicenter clinical trial. J Thromb Haemost 2017;15(4):636-644.

153. Wu R YW, Luo X, et.al. . Results from a Prospective, Dose Escalating, Prophylaxis Study in Young Boys with Severe Hemophilia a in China: The China Hemophilia Individualized Prophylaxis Study (CHIPS)(NCT02999308). . Blood., 2017, 130 (Supp 1):3683.

154. Oldenburg J, Klamroth R, Szamosi J, et al. Long-term safety and efficacy of recombinant factor VIII Fc (rFVIIIFc) for the treatment of severe haemophilia A: European subgroup interim analysis of the ASPIRE study. . Hamostaseologie, 2016, 36.

155. Khair K, Mazzucconi MG, Parra R, et al. Pattern of bleeding in a large prospective cohort of haemophilia A patients: A three-year follow-up of the AHEAD (Advate in HaEmophilia A outcome Database) study. Haemophilia 2018;24(1):85-96.

156. Mason JA, Parikh S, Tran H, et al. Australian multicentre study of current real-world prophylaxis practice in severe and moderate haemophilia A and B. Haemophilia 2018;24(2):253-260.

157. Osooli M, Steen Carlsson K, Baghaei F, et al. The association between health utility and joint status among people with severe haemophilia A: findings from the KAPPA register. Haemophilia 2017;23(3):e180-e187.

158. Manco-Johnson MJ, Soucie JM, Gill JC. Prophylaxis usage, bleeding rates, and joint outcomes of hemophilia, 1999 to 2010: a surveillance project. Blood 2017;129(17):2368-2374.

159. Dube E, Bonnefoy A, Merlen C, et al. A prospective surveillance study of inhibitor development in haemophilia A patients following a population switch to a third-generation B-domain-deleted recombinant factor VIII. Haemophilia 2018;24(2):236-244.

160. Higgins JP, Thompson SG. Quantifying heterogeneity in a meta-analysis. Stat Med 2002;21(11):1539–1558.
